# Supplementary material for: A systematic review of the incidence and prevalence of comorbidity in multiple sclerosis: Overview
Source: PubMed Central journal article supplement — Mult Scler. 2015 Mar;21(3):263–81. doi: 10.1177/1352458514564491 (PMC4361468; doi:10.1177/1352458514564491), 2015-03
Supplement: Supplemental_Appendix.pdf [file Supplemental_Appendix.pdf]

# Supplemental Appendix I

## Systematic Review Data Collection Form

### Reference Information:

Authors: \_\_\_\_\_

Title: \_\_\_\_\_

Journal: \_\_\_\_\_

Year: \_\_\_\_\_ Volume: \_\_\_\_\_ Issue: \_\_\_\_\_ Page Numbers: \_\_\_\_\_

Language of Publication: \_\_\_\_\_

### Reason for exclusion:

- Non-English
- Not relevant (not assessing comorbidity)
- Review article
- Not original data (data presented in another paper already)
- Methods not reported (thus cannot be evaluated)

### General Information:

Continent Where Data Collection Occurred (check all that apply)

- |                                        |                                        |
|----------------------------------------|----------------------------------------|
| <input type="checkbox"/> Africa        | <input type="checkbox"/> Asia          |
| <input type="checkbox"/> Australia     | <input type="checkbox"/> Europe        |
| <input type="checkbox"/> North America | <input type="checkbox"/> South America |

Country or Countries Where Data Collection Occurred \_\_\_\_\_

State/ Province/ County/ City Where Data Collection Occurred (if not national) \_\_\_\_\_

Time Period for Data Collection: \_\_\_\_\_

### Study Population:

Population-Based Sample:  Yes  No

Sample Size: \_\_\_\_\_

Response Rate: \_\_\_\_\_

- Unknown
- Not Applicable\*

\*Choose not applicable in studies that did not directly contact patients (i.e. chart reviews, administrative data studies, etc)

**MS Definition and Description:**

Diagnoses included (mark all that apply):

- RIS (Radiologically Isolated Syndrome)
- CIS (Clinically Isolated Syndrome)
- MS (Multiple Sclerosis)
- NMO (Neuromyelitis Optica) spectrum disorder
- ADEM
- Other CNS demyelinating disorder

Diagnostic Criteria used for MS

- Schumacher
- McAlpine
- Rose
- Bauer
- Poser
- McDonald 2001
- McDonald 2005
- McDonald 2010
- Other \_\_\_\_\_
- Not reported

Clinical courses of MS included (mark all that apply):

- Relapsing remitting
- Secondary progressive
- Primary progressive
- Progressive relapsing
- Uncertain
- Not reported

**Duration of MS from onset:** mean \_\_\_\_\_ SD \_\_\_\_\_

**Age of MS onset:** mean \_\_\_\_\_ SD \_\_\_\_\_

**EDSS:** median \_\_\_\_\_ range \_\_\_\_\_

mean \_\_\_\_\_ SD \_\_\_\_\_

**Comorbidity Information:**

Definition of condition: \_\_\_\_\_  
\_\_\_\_\_  
\_\_\_\_\_  
\_\_\_\_\_

Were Diagnostic Criteria Used to Make the Diagnosis of Comorbidity?

- Yes
- No
- Not reported

If yes, please list the criteria below

\_\_\_\_\_  
\_\_\_\_\_  
\_\_\_\_\_

**Methodological Information:**

Data Sources (mark all that apply):

- |                                                       |                                                     |
|-------------------------------------------------------|-----------------------------------------------------|
| <input type="checkbox"/> Door-to-door survey          | <input type="checkbox"/> Telephone survey           |
| <input type="checkbox"/> Mailed survey                | <input type="checkbox"/> Administrative databases   |
| <input type="checkbox"/> Hospital/clinic chart review | <input type="checkbox"/> Prescription drug database |
| <input type="checkbox"/> Registry/clinical database   |                                                     |
| <input type="checkbox"/> Other (specify): _____       |                                                     |

How was Diagnosis Established (mark all that apply)?

- Clinical Assessment by a Health Professional
- Interview
- Medical chart review
- Administrative data codes (specify codes: \_\_\_\_\_)
- Self-report of a condition (diagnosed by a health professional)
- Self-report of a condition (undiagnosed by a health professional)
- Use of specific prescription drug
- Genetic test
- Imaging Test (x-ray, ultrasound, CT, MRI, etc) \_\_\_\_\_
- Laboratory test (specify): \_\_\_\_\_
- Other (specify): \_\_\_\_\_

Not reported

If by interview and physical assessment, interviewer blinded to case control status (diseased vs. not diseased)?

Yes  No  Not applicable

Overall Incidence in MS population: \_\_\_\_\_

LCL \_\_\_\_\_

UCL \_\_\_\_\_

Age-standardized incidence: \_\_\_\_\_

LCL \_\_\_\_\_

UCL \_\_\_\_\_

Standard population used: \_\_\_\_\_

Overall Prevalence: \_\_\_\_\_

Age-standardized prevalence: \_\_\_\_\_

LCL \_\_\_\_\_

UCL \_\_\_\_\_

Standard population used: \_\_\_\_\_

Breakdown of Incidence/Prevalence by Socio-Demographic Factors

|                   |        | Incidence | Prevalence | Not Specified |
|-------------------|--------|-----------|------------|---------------|
| Gender            | Male   |           |            |               |
|                   | Female |           |            |               |
| Area of Residence | Urban  |           |            |               |
|                   | Rural  |           |            |               |
| Age               |        |           |            |               |
|                   |        |           |            |               |
|                   |        |           |            |               |
|                   |        |           |            |               |
|                   |        |           |            |               |
|                   |        |           |            |               |
|                   |        |           |            |               |
| Ethnicity         |        |           |            |               |

|  |  |  |  |  |
|--|--|--|--|--|
|  |  |  |  |  |
|  |  |  |  |  |
|  |  |  |  |  |
|  |  |  |  |  |
|  |  |  |  |  |
|  |  |  |  |  |
|  |  |  |  |  |
|  |  |  |  |  |
|  |  |  |  |  |

**Comparative Data (note this section will also serve to assess quality for studies with controls)**

Comparisons to other populations (controls):  Yes  No

If yes, selection of controls:

- From literature
- Clinic-based
- Hospital-based
- Community-based
- Population-based
- Not reported

Comparability of cases and controls on basis of design or analysis:

Matched  Yes  No  
 If yes, on  sex  age  ethnicity  region  
 other specify \_\_\_\_\_

If not matched, study controls for  sex  age  ethnicity  region  
 other specify \_\_\_\_\_

Definition of controls:

- No history of MS
- No description

Response rate in controls \_\_\_\_\_ Same as in MS cases  Yes  No

Assessment of comorbidity comparable in cases & controls  Yes  No  Not reported

Comorbidity data for comparison population

Overall Incidence in comparison population: \_\_\_\_\_

LCL \_\_\_\_\_

UCL \_\_\_\_\_

Age-standardized incidence: \_\_\_\_\_

LCL \_\_\_\_\_

UCL \_\_\_\_\_

Standard population used: \_\_\_\_\_

Overall Prevalence: \_\_\_\_\_

Age-standardized prevalence: \_\_\_\_\_

LCL \_\_\_\_\_

UCL \_\_\_\_\_

Standard population used: \_\_\_\_\_

**Breakdown of Incidence/Prevalence by Socio-Demographic Factors**

|                   |        | <b>Incidence</b> | <b>Prevalence</b> | <b>Not Specified</b> |
|-------------------|--------|------------------|-------------------|----------------------|
| Gender            | Male   |                  |                   |                      |
|                   | Female |                  |                   |                      |
| Area of Residence | Urban  |                  |                   |                      |
|                   | Rural  |                  |                   |                      |
| Age               |        |                  |                   |                      |
|                   |        |                  |                   |                      |
|                   |        |                  |                   |                      |
|                   |        |                  |                   |                      |
|                   |        |                  |                   |                      |
|                   |        |                  |                   |                      |
|                   |        |                  |                   |                      |
| Ethnicity         |        |                  |                   |                      |
|                   |        |                  |                   |                      |
|                   |        |                  |                   |                      |
|                   |        |                  |                   |                      |
|                   |        |                  |                   |                      |
|                   |        |                  |                   |                      |
|                   |        |                  |                   |                      |

**Quality Assessment<sup>1,2,3</sup>**

REPRESENTATIVENESS OF SAMPLE

**1. Is the target population clearly defined?**     Yes    No    Unclear    Not reported

e.g. The target population must be defined by shared characteristics assessed and measure accurately. Some of these characteristics include age, sex, ethnicity, income, etc. Clear inclusion and exclusion criteria.

**2. Was either of the following ascertainment method used (must be one or the other)**

- 1) **probability sampling OR**  
2) **entire population surveyed**  Yes  No  Unclear  Not reported

e.g. Members of the target population were identified through a sampling frame or listing of potential respondents. This listing must provide access to all members or the defined target population except for exclusions acknowledged by the study authors.

3. **Is the response rate  $\geq 70\%$**   Yes  No  Unclear  Not reported  
\* note that if entire population captured using health claims data or registry mark 'yes'

4. **Are non-responders clearly described?**  Yes  No  Unclear  Not reported  
 Not applicable

5. **Is the sample representative of the target population?**  Yes  No  Unclear  Not reported  
e.g. need to ensure that non responders have similar characteristics as responders (otherwise may have selection bias)  
note that if entire population captured using health claims data mark 'yes'

#### ASSESSMENT OF COMORBID CONDITION

6. **Were data collection methods standardized?**  Yes  No  Unclear  Not reported

e.g. Identical methods of assessment and data collection were used with all respondents so that the information for analysis is completely comparable. Standardization of methods not only refer to eliciting information from respondents but also to interviewing training, supervision, enlistment of respondents and processing of data.

- 7a. **Were validated criteria used to assess for the presence/ absence of multiple sclerosis?**  Yes  No  Unclear  Not reported

e.g. or a validated scale, diagnostic tool, survey, etc.

- 7b. **Were validated criteria used to assess for the presence/ absence of disease?**  Yes  No  Unclear  Not reported

e.g. or a validated scale, diagnostic tool, survey, etc.

#### STATISTICAL ANALYSIS

8. **Are the estimates of prevalence and incidence given with confidence intervals and in detail by subgroup (if applicable)?**  Yes  No  Unclear  NR

9. **Are standardized estimates reported?**  Yes  No  Not reported

## References:

1. Boyle M.H. Guidelines for evaluating prevalence studies. *Evid Based Mental Health*. 1998;1:37-39.
2. Loney P.L. et al. Critical appraisal of the health research literature: Prevalence or incidence of a health problem. *Chronic Dis in Canada*. 2000;19(4) accessed on Nov 27, 2010 on the Public Health Agency of Canada website at: [http://www.phac-aspc.gc.ca/publicat/cdic-mcc/19-4/e\\_e.html](http://www.phac-aspc.gc.ca/publicat/cdic-mcc/19-4/e_e.html).
3. Evans C, Beland S, Kulaga S, et al. Incidence and prevalence of multiple sclerosis in the Americas: a systematic review. *Neuroepidemiology* 2013;40(3):195-210
