# Supplementary material for: A systematic review of the incidence and prevalence of comorbidity in multiple sclerosis: Overview
Source: PubMed Central journal article supplement — Mult Scler. 2015 Mar;21(3):263–81. doi: 10.1177/1352458514564491 (PMC4361468; doi:10.1177/1352458514564491), 2015-03
Supplement: Supplemental_Table_1.pdf [file Supplemental_Table_1.pdf]

**Supplemental Table 1. Characteristics of the 249 unique studies that were subject of the review including last name of author, year of publication, Continent, Region, MS diagnostic criteria, source of data and comorbidities studied.**

| Author (Year)                  | Continent     | Region              | MS Diagnostic Criteria             | Source | Comorbidities                                               | Quality Score |
|--------------------------------|---------------|---------------------|------------------------------------|--------|-------------------------------------------------------------|---------------|
| Achiron <sup>1</sup> (2005)    | Asia          | Israel              | Poser                              | 2      | Cancer                                                      | 5/8           |
| Allen <sup>2</sup> (2008)      | North America | US/New York State   | Administrative data codes          | 1      | Stroke<br>Diabetes<br>IHD<br>Hypertension<br>Hyperlipidemia | 4/8           |
| Allen <sup>3</sup> (2013)      | Europe        | England             | Administrative data codes          | 1      | Epilepsy                                                    | 4/8           |
| Alschuler <sup>4</sup> (2012)  | North America | US/Washington       | Self-report                        | 3      | Depression                                                  | 4/9           |
| Amato <sup>5</sup> (2001)      | Europe        | Italy/Florence      | Poser                              | 3      | Depression                                                  | 4/9           |
| Annunziata <sup>6</sup> (2011) | Europe        | Italy               | McDonald 2001                      | 2      | AID                                                         | 4/9           |
| Auger <sup>7</sup> (2005)      | North America | Canada/Quebec       | Neurologist diagnosed: criteria NR | 3      | Sleep                                                       | 3/9           |
| Avasarala <sup>8</sup> (2003)  | North America | US/Washington       | Neurologist diagnosed: criteria NR | 3      | Depression                                                  | 2/9           |
| Bahmanyar <sup>9</sup> (2009)  | Europe        | Sweden              | Administrative data codes          | 1      | Cancer                                                      | 7/8           |
| Baker <sup>10</sup> (1972)     | Australia/NZ  | Australia/Melbourne | Neurologist diagnosed: criteria NR | 2      | AID                                                         | 1/8           |

|                                        |               |                  |                                    |   |                             |     |
|----------------------------------------|---------------|------------------|------------------------------------|---|-----------------------------|-----|
| Bamer <sup>11</sup> (2008)             | North America | US/Washington    | Self-report                        | 3 | Depression                  | 3/9 |
| Barcellos <sup>12</sup> (2006)         | North America | US/California    | Neurologist diagnosed              | 4 | AID                         | 4/9 |
| Basiri <sup>13</sup> (2009)            | Asia          | Iran/Isfahan     | McDonald                           | 2 | IBD                         | 3/8 |
| Baumstarck-Barrau <sup>14</sup> (2011) | Europe        | France/Marseille | McDonald 2001 or 2005              | 3 | Depression                  | 4/9 |
| Bazelier <sup>15</sup> (2012)          | Europe        | UK               | Administrative data codes          | 1 | Visual Disorders            | 8/8 |
| Beiske <sup>16</sup> (2008)            | Europe        | Norway/Akershus  | Poser                              | 3 | Anxiety<br>Depression       | 8/9 |
| Bergamaschi <sup>17</sup> (2009)       | Europe        | Italy/Pavia      | McDonald                           | 3 | Lung Disease                | 5/8 |
| Bloomgren <sup>18</sup> (2012)         | North America | US               | Administrative data codes          | 1 | Cancer                      | 3/8 |
| Bodini <sup>19</sup> (2008)            | Europe        | Italy            | McDonald 2001                      | 3 | Depression                  | 4/8 |
| Bombardier <sup>20</sup> (2004)        | North America | US/Washington    | Self-report                        | 3 | Alcohol abuse<br>Drug abuse | 4/9 |
| Borhani <sup>21</sup> (2007)           | Asia          | Iran/Shiraz      | Poser                              | 2 | AID                         | 4/9 |
| Brajkovic <sup>22</sup> (2009)         | Europe        | Croatia          | NR                                 | 3 | Anxiety<br>Depression       | 5/9 |
| Braley <sup>23</sup> (2012)            | North America | US/Michigan      | Neurologist diagnosed: criteria NR | 4 | Sleep                       | 4/9 |
| Brichetto <sup>24</sup> (2003)         | Europe        | Italy/Genoa      | Poser                              | 3 | Epilepsy<br>Depression      | 5/9 |

|                                   |               |                  |                                    |   |                                                                                  |     |
|-----------------------------------|---------------|------------------|------------------------------------|---|----------------------------------------------------------------------------------|-----|
| Brown <sup>25</sup> (2009)        | Australia/NZ  | Australia/Sydney | Poser                              | 3 | Depression                                                                       | 5/9 |
| Buchanan <sup>26</sup> (2003)     | North America | US               | Administrative data codes          | 1 | Depression                                                                       | 5/8 |
| Buchanan <sup>27</sup> (2006)     | North America | US               | Self-report                        | 3 | AID<br>Diabetes<br>Hypertension<br>Hyperlipidemia<br>MSK<br>Cancer<br>Depression | 2/9 |
| Buchanan <sup>28</sup> (2011)     | North America | US               | Self-report                        | 2 | Depression                                                                       | 4/9 |
| Burns <sup>29</sup> (2013)        | North America | US               | McDonald 2005                      | 4 | Anxiety<br>Depression                                                            | 5/9 |
| Carta <sup>30</sup> (2004)        | Europe        | Italy/Cagliari   | McDonald 2010                      | 3 | Bipolar disorder<br>Depression                                                   | 5/9 |
| Catenoix <sup>31</sup> (1972)     | Europe        | France/Lyon      | Poser                              | 2 | Epilepsy                                                                         | 5/8 |
| Cendrowski <sup>32</sup> (1972)   | Europe        | Poland           | Neurologist diagnosed: criteria NR | 2 | Epilepsy                                                                         | 1/9 |
| Cendrowski <sup>33</sup> (1989)   | Europe        | Poland           | Neurologist diagnosed: criteria NR | 2 | IBD<br>AID                                                                       | 0/9 |
| Cetin <sup>34</sup> (2007)        | North America | US/Washington    | Self-report                        | 3 | Depression                                                                       | 3/9 |
| Cheng <sup>35</sup> (2012)        | Asia          | Taiwan           | Poser or McDonald 2001             | 2 | Epilepsy                                                                         | 5/8 |
| Christiansen <sup>36</sup> (2010) | Europe        | Denmark          | Administrative data codes          | 1 | Cardiac Arrhythmias<br>Stroke<br>CHF                                             | 6/8 |

|                                 |               |                       |                                       |   |                                                                                                  |     |
|---------------------------------|---------------|-----------------------|---------------------------------------|---|--------------------------------------------------------------------------------------------------|-----|
|                                 |               |                       |                                       |   | IHD<br>Diabetes<br>Valvular disease<br>Hypertension<br>GI tract<br>Lung disease<br>MSK<br>Cancer |     |
| Chwastiak <sup>37</sup> (2002)  | North America | US/Washington         | Self-report                           | 3 | Depression                                                                                       | 3/9 |
| Da Silva <sup>38</sup> (2011)   | Europe        | Portugal              | McDonald 2005                         | 3 | Anxiety<br>Depression                                                                            | 5/8 |
| Dahl <sup>39</sup> (2009)       | Europe        | Norway/Nord-Trondelag | Poser                                 | 3 | Anxiety<br>Depression                                                                            | 7/9 |
| Dallmeijer <sup>40</sup> (2009) | Europe        | Netherlands/Amsterdam | NR                                    | 2 | Diabetes<br>Lung Disease<br>MSK                                                                  | 2/9 |
| De Keyser <sup>41</sup> (1988)  | Europe        | England/London        | Poser                                 | 2 | AID<br>Diabetes<br>GI Tract                                                                      | 3/8 |
| de Seze <sup>42</sup> (2005)    | Europe        | France/Lille          | Neurologist diagnosed: criteria<br>NR | 2 | AID                                                                                              | 3/8 |
| Demakis <sup>43</sup> (2009)    | North America | US                    | Administrative data codes             | 1 | Bipolar disorder<br>Psychoses<br>Anxiety<br>Depression                                           | 5/9 |
| Deretzi <sup>44</sup> (2010)    | Europe        | Greece                | McDonald 2001                         | 2 | AID<br>GI Tract<br>Diabetes                                                                      | 6/8 |
| Deriu <sup>45</sup> (2009)      | Europe        | Italy/Cagliari        | McDonald 2001                         | 3 | Sleep                                                                                            | 6/9 |
| Dias <sup>46</sup> (2012)       | North America | US/California         | Self-report                           | 3 | Sleep                                                                                            | 2/9 |

|                                                |               |                         |                                    |   |                                                                                  |     |
|------------------------------------------------|---------------|-------------------------|------------------------------------|---|----------------------------------------------------------------------------------|-----|
| Drake <sup>47</sup> (1961)                     | North America | US/California           | NR                                 | 4 | Epilepsy                                                                         | 0/9 |
| Durelli <sup>48</sup> (2001)                   | Europe        | Italy                   | Neurologist diagnosed: criteria NR | 2 | AID                                                                              | 4/9 |
| Durmus <sup>49</sup> (2013)                    | Europe        | Turkey                  | McDonald 2001                      | 2 | Epilepsy                                                                         | 5/8 |
| Eaton <sup>50</sup> (2007)                     | Europe        | Denmark                 | Administrative data codes          | 1 | AID<br>GI Tract<br>Diabetes                                                      | 4/8 |
| Edwards <sup>51</sup> (2004)                   | Europe        | England/Nottingham      | MS clinic database                 | 2 | AID<br>GI Tract<br>Diabetes<br>Lung Disease<br>MSK<br>Cancer<br>Bipolar disorder | 2/8 |
| Einarsson <sup>52</sup> (2003)                 | Europe        | Sweden/Stockholm        | Neurologist diagnosed: criteria NR | 3 | Depression                                                                       | 3/9 |
| Engelsen <sup>53</sup> (1997)                  | Europe        | Norway/Hordaland County | McAlpine                           | 2 | Epilepsy                                                                         | 7/8 |
| Eriksson <sup>54</sup> (2002)                  | Europe        | Sweden/Gothenberg       | Poser                              | 2 | Epilepsy                                                                         | 7/8 |
| Espinola-Nadurille <sup>55</sup> (2010)        | North America | Mexico                  | McDonald 2004                      | 4 | Psychoses<br>Bipolar disorder<br>Anxiety<br>Depression                           | 4/8 |
| Etemadifar <sup>56, 57</sup> (2012) and (2013) | Asia          | Iran/Isfahan            | McDonald 2005                      | 2 | Epilepsy                                                                         | 7/8 |
| Fanouriakis <sup>58</sup> (2013)               | Europe        | Greece/Crete            | McDonald 2010                      | 2 | AID                                                                              | 6/8 |

|                                                                  |               |                    |                                    |   |                                                                                                                                |     |
|------------------------------------------------------------------|---------------|--------------------|------------------------------------|---|--------------------------------------------------------------------------------------------------------------------------------|-----|
| Feinstein <sup>59</sup> (2002)                                   | North America | Canada/Ontario     | Poser                              | 4 | Alcohol abuse<br>Drug abuse<br>Anxiety<br>Depression                                                                           | 5/9 |
| Feinstein <sup>60</sup> (2002) and Korostil <sup>61</sup> (2007) | North America | Canada/Ontario     | Poser                              | 4 | Anxiety<br>Depression                                                                                                          | 5/9 |
| Ferini-Strambi <sup>62</sup> (1994)                              | Europe        | Italy/Milan        | Poser                              | 4 | Sleep                                                                                                                          | 4/9 |
| Ferrando <sup>63</sup> (2007)                                    | North America | US/New York        | Neurologist diagnosed: criteria NR | 3 | Depression                                                                                                                     | 3/9 |
| Finlayson <sup>64</sup> (2013)                                   | North America | US/Illinois        | Self-report                        | 3 | Stroke<br>Diabetes<br>Lung Disease<br>MSK                                                                                      | 2/9 |
| Fisk <sup>65</sup> (1998)                                        | North America | Canada/Nova Scotia | Administrative data codes          | 1 | Bipolar disorder<br>Depression                                                                                                 | 5/8 |
| Fleming <sup>66</sup> (1994)                                     | North America | US                 | Administrative data codes          | 1 | Cardiac Arrhythmias<br>Stroke<br>CHF<br>IHD<br>Diabetes<br>Hypertension<br>GI tract<br>Lung disease<br>Renal Disease<br>Cancer | 4/8 |
| Forbes <sup>67</sup> (2006)                                      | Europe        | England            | Neurologist diagnosed: criteria NR | 3 | Depression                                                                                                                     | 2/9 |
| Foroughipour <sup>68</sup> (2012)                                | Asia          | Iran/Mashhad       | McDonald 2000                      | 3 | Anxiety                                                                                                                        | 4/9 |
| Fragoso <sup>69</sup> (2011)                                     | South America | Brazil             | McDonald 2001                      | 4 | Sleep                                                                                                                          | 5/9 |

|                                  |               |                        |                                    |   |                                                            |     |
|----------------------------------|---------------|------------------------|------------------------------------|---|------------------------------------------------------------|-----|
| Fromont <sup>70</sup> (2013)     | Europe        | France                 | Administrative data codes          | 1 | AID<br>Diabetes<br>IHD<br>GI Tract<br>Cancer               | 7/8 |
| Fuvesi <sup>71</sup> (2010)      | Europe        | Hungary                | McDonald 2001                      | 3 | Hypertension<br>Depression                                 | 4/9 |
| Galeazzi <sup>72</sup> (2005)    | Europe        | Italy                  | Poser                              | 4 | Alcohol abuse<br>Bipolar disorder<br>Anxiety<br>Depression | 6/9 |
| Gambardella <sup>73</sup> (2003) | Europe        | Italy/Catanzaro        | Poser                              | 2 | Epilepsy                                                   | 5/8 |
| Garfield <sup>74</sup> (2012)    | Europe        | UK/Nottingham          | Neurologist diagnosed: criteria NR | 3 | Anxiety                                                    | 3/9 |
| Ghadirian <sup>75</sup> (2001)   | North America | Canada/Quebec          | Self-report                        | 3 | AID<br>Visual Disorder<br>Cancer                           | 3/9 |
| Ghajarzadeh <sup>76</sup> (2002) | Asia          | Iran/Tehran            | McDonald                           | 3 | Depression                                                 | 4/9 |
| Ghezzi <sup>77</sup> (1990)      | Europe        | Italy/Milano           | McAlpine                           | 2 | Epilepsy                                                   | 6/8 |
| Gold <sup>78</sup> (2003)        | Europe        | Germany                | Poser                              | 3 | Anxiety<br>Depression                                      | 5/8 |
| Goldacre <sup>79</sup> (2004)    | Europe        | England/Oxford         | Administrative data codes          | 1 | Sleep                                                      | 5/9 |
| Gomez-Choco <sup>80</sup> (2007) | Europe        | Spain/Barcelona        | Poser                              | 4 | Sleep                                                      | 5/9 |
| Goodin <sup>81</sup> (1999)      | North America | US/Northern California | Neurologist diagnosed: criteria NR | 3 | Depression                                                 | 3/9 |

|                                |               |                      |                                    |   |                                                            |     |
|--------------------------------|---------------|----------------------|------------------------------------|---|------------------------------------------------------------|-----|
| Goretti <sup>82</sup> (2009)   | Europe        | Italy/Florence       | McDonald 2000                      | 3 | Anxiety<br>Depression                                      | 4/9 |
| Goretti <sup>83</sup> (2010)   | Europe        | Italy                | McDonald 2001                      | 4 | Bipolar disorder<br>Anxiety<br>Depression                  | 6/8 |
| Gottberg <sup>84</sup> (2007)  | Europe        | Sweden/Stockholm     | Medical records                    | 3 | Depression                                                 | 7/9 |
| Hakim <sup>85</sup> (2000)     | Europe        | England/Hampshire    | Poser                              | 3 | Anxiety<br>Depression                                      | 7/9 |
| Hanrahan <sup>86</sup> (1988)  | North America | Canada/Alberta       | Neurologist diagnosed: criteria NR | 2 | AID                                                        | 2/8 |
| Harel <sup>87</sup> (2007)     | Asia          | Israel               | Poser                              | 4 | Psychoses<br>Personality disorder<br>Anxiety<br>Depression | 6/9 |
| Hemminki <sup>88</sup> (2011)  | Europe        | Sweden               | Administrative data codes          | 1 | Cancer<br>Lung Disease                                     | 5/8 |
| Hemminki <sup>89</sup> (2012)  | Europe        | Sweden               | Administrative data codes          | 1 | Cancer                                                     | 5/8 |
| Hemminki <sup>90</sup> (2012)  | Europe        | Sweden               | Administrative data codes          | 1 | Cancer                                                     | 5/8 |
| Hemminki <sup>89</sup> (2012)  | Europe        | Sweden               | Administrative data codes          | 1 | Cancer                                                     | 5/8 |
| Hemminki <sup>91</sup> (2013)  | Europe        | Sweden               | Administrative data codes          | 1 | Cancer                                                     | 5/8 |
| Hemminki <sup>92</sup> (2013)  | Europe        | Sweden               | Administrative data codes          | 1 | Cancer                                                     | 5/8 |
| Henderson <sup>93</sup> (2000) | Australia/NZ  | Australia Queensland | Medical Records and Poser          | 2 | AID<br>Diabetes<br>GI Tract                                | 4/9 |



|                                     |               |                         |                                    |   |                                                                                                                                                                                                                 |     |
|-------------------------------------|---------------|-------------------------|------------------------------------|---|-----------------------------------------------------------------------------------------------------------------------------------------------------------------------------------------------------------------|-----|
| Hjalgrim <sup>94</sup> (2004)       | Europe        | Denmark                 | Administrative data codes          | 1 | Cancer                                                                                                                                                                                                          | 7/8 |
| Holper <sup>95</sup> (2010)         | Europe        | Germany and Switzerland | Poser and McDonald 2005            | 3 | Hypertension<br>Depression                                                                                                                                                                                      | 6/9 |
| Hopman <sup>96</sup> (2007)         | North America | Canada/Ontario          | Neurologist diagnosed: criteria NR | 3 | Hypertension<br>Depression                                                                                                                                                                                      | 6/9 |
| Hoppenbrouwers <sup>97</sup> (2007) | Europe        | Netherlands             | Poser                              | 2 | AID<br>Diabetes                                                                                                                                                                                                 | 8/9 |
| Horton <sup>98</sup> (2010)         | North America | US and Canada           | McDonald 2005                      | 3 | AID<br>Diabetes<br>IHD<br>Hypertension<br>Hyperlipidemia<br>Visual disorder<br>Epilepsy<br>GI Tract<br>Lung Disease<br>MSK<br>Renal Disease<br>Cancer<br>Psychoses<br>Bipolar disorder<br>Anxiety<br>Depression | 5/8 |
| Hussein <sup>99</sup> (2006)        | Asia          | Saudi Arabia            | NR                                 | 2 | Diabetes                                                                                                                                                                                                        | 1/8 |
| Isaksson (2007)                     | Europe        | Sweden/Orebro           | Poser                              | 3 | Depression                                                                                                                                                                                                      | 4/9 |
| Jadidi <sup>100</sup> (2013)        | Europe        | Sweden                  | Administrative data codes          | 1 | Cardiac Arrhythmias<br>Stroke<br>CHF<br>IHD<br>Diabetes                                                                                                                                                         | 5/8 |

|                                                                  |               |                     |                                    |   |                                                                           |     |
|------------------------------------------------------------------|---------------|---------------------|------------------------------------|---|---------------------------------------------------------------------------|-----|
|                                                                  |               |                     |                                    |   | Valvular disease<br>Hypertension<br>GI tract<br>Lung disease              |     |
| Janardhan <sup>101</sup> (2002)                                  | North America | US                  | Poser                              | 4 | Depression                                                                | 4/9 |
| Janssens <sup>102</sup> (2003) and Siepman <sup>103</sup> (2008) | Europe        | Netherlands         | Poser                              | 3 | Anxiety<br>Depression                                                     | 7/9 |
| Janssens <sup>104</sup> (2006)                                   | Europe        | Netherlands         | Poser                              | 3 | Anxiety                                                                   | 5/9 |
| Joffe <sup>105</sup> (1987)                                      | North America | Canada/Toronto      | Neurologist diagnosed: criteria NR | 4 | Psychoses<br>Anxiety<br>Bipolar disorder<br>Depression                    | 3/9 |
| Johansson <sup>106, 107</sup> (2007) and (2008)                  | Europe        | Sweden/Stockholm    | Poser                              | 3 | Depression                                                                | 5/9 |
| Jonsson <sup>108</sup> (1996)                                    | Europe        | Denmark/Haslev      | Schumacher                         | 3 | Depression                                                                | 5/9 |
| Julian <sup>109</sup> (2009)                                     | North America | US                  | Neurologist diagnosed: criteria NR | 3 | Depression                                                                | 3/9 |
| Kahn <sup>110</sup> (2007)                                       | Australia/NZ  | Australia/Melbourne | Poser and Paty                     | 2 | Stroke<br>Diabetes<br>IHD<br>Hypertension<br>Hyperlipidemia<br>Depression | 3/9 |
| Kaminska <sup>111</sup> (2012)                                   | North America | Canada/Montreal     | McDonald 2001                      | 3 | Sleep                                                                     | 4/9 |
| Kang <sup>112</sup> (2010)                                       | Asia          | Taiwan              | Administrative data codes          | 1 | Cardiac Arrhythmias<br>Stroke<br>CHF<br>AID<br>IHD                        | 4/8 |

|                                    |               |                         |                                    |   |                                                                                                                                                                         |     |
|------------------------------------|---------------|-------------------------|------------------------------------|---|-------------------------------------------------------------------------------------------------------------------------------------------------------------------------|-----|
|                                    |               |                         |                                    |   | Peripheral Vascular Disease<br>Diabetes<br>Hypertension<br>Hyperlipidemia<br>Epilepsy<br>Cancer<br>GI Tract<br>Lung Disease<br>Renal Disease<br>Psychoses<br>Depression |     |
| Kanjwal <sup>113</sup> (2010)      | North America | US/Ohio                 | Neurologist diagnosed: criteria NR | 2 | Diabetes<br>IHD<br>Hyperlipidemia                                                                                                                                       | 3/8 |
| Karara <sup>114</sup> (2013)       | Asia          | Egypt/Cairo             | McDonald                           | 2 | AID                                                                                                                                                                     | 3/9 |
| Kargarfard <sup>115</sup> (2012)   | Asia          | Iran/Isfahan            | Neurologist diagnosed: criteria NR | 3 | Depression                                                                                                                                                              | 3/8 |
| Karimi <sup>116</sup> (2013)       | Asia          | Iran/Tehran             | Neurologist diagnosed: criteria NR | 4 | Lung Disease                                                                                                                                                            | 4/9 |
| Karni <sup>117</sup> (1999)        | Asia          | Israel                  | Poser                              | 2 | AID                                                                                                                                                                     | 5/9 |
| Kehler <sup>118</sup> (2009)       | North America | Canada                  | Self-report                        | 3 | Anxiety<br>Depression                                                                                                                                                   | 4/9 |
| Ketelslegers <sup>119</sup> (2010) | North America | Canada                  | Self-report                        | 3 | Depression                                                                                                                                                              | 4/9 |
| Kingwell <sup>120</sup> (2012)     | North America | Canada/British Columbia | Poser                              | 1 | Cancer                                                                                                                                                                  | 7/8 |
| Kinnunen <sup>121</sup> (1986)     | Europe        | Finland/Uusimaa         | Schumacher                         | 2 | Epilepsy                                                                                                                                                                | 8/8 |

|                                    |               |                               |                                          |   |                                                             |     |
|------------------------------------|---------------|-------------------------------|------------------------------------------|---|-------------------------------------------------------------|-----|
| Klevan <sup>122</sup> (2014)       | Europe        | Norway/Hordaland County       | Poser                                    | 3 | Depression                                                  | 8/9 |
| Koshiol <sup>123</sup> (2011)      | North America | US                            | Administrative data codes                | 1 | Cancer                                                      | 5/8 |
| Krokki <sup>124</sup> (2006)       | Europe        | Finland/Northern Ostrobothnia | Administrative data codes/ neurologist   | 2 | Stroke<br>Epilepsy                                          | 6/8 |
| Landgren <sup>125</sup> (2011)     | North America | US                            | Administrative data codes                | 1 | Cancer                                                      | 3/8 |
| Langer Gould <sup>126</sup> (2010) | North America | US/Northern California        | Diagnostic codes entered by neurologists | 2 | AID<br>IBD<br>Diabetes<br>GI Tract                          | 6/8 |
| Laroni <sup>127</sup> (2006)       | Europe        | Italy/Veneto                  | Poser                                    | 2 | AID<br>Diabetes                                             | 5/9 |
| LaVela <sup>128</sup> (2012)       | North America | US                            | Self-report                              | 3 | Stroke<br>IHD<br>Diabetes<br>Hypertension<br>Hyperlipidemia | 4/8 |
| Lawrenson <sup>129</sup> (2001)    | Europe        | UK                            | Administrative data codes                | 1 | Renal Disease                                               | 6/8 |
| Le Scanff <sup>130</sup> (2008)    | Europe        | France/Lyon                   | Poser                                    | 2 | AID                                                         | 6/8 |
| Lebrun <sup>131</sup> (2008)       | Europe        | France                        | Poser and McDonald 2001                  | 2 | Cancer                                                      | 6/8 |
| Lebrun <sup>132</sup> (2011)       | Europe        | France                        | Poser and McDonald 2001                  | 2 | Cancer                                                      | 8/9 |
| Lehan <sup>133</sup> (2012)        | North America | Mexico/Guadalajara            | Neurologist diagnosed: criteria NR       | 3 | Anxiety<br>Depression                                       | 1/9 |

|                                                   |               |                         |                                    |   |                                                                              |     |
|---------------------------------------------------|---------------|-------------------------|------------------------------------|---|------------------------------------------------------------------------------|-----|
| Leonavicius <sup>134, 135</sup> (2011) and (2012) | Europe        | Lithuania               | Neurologist diagnosed: criteria NR | 3 | Depression                                                                   | 3/9 |
| Leonavicius <sup>136</sup> (2013)                 | Europe        | Lithuania               | Neurologist diagnosed: criteria NR | 3 | Anxiety                                                                      | 3/9 |
| Levinthal <sup>137</sup> (2013)                   | North America | US/Pittsburgh           | Neurologist diagnosed: criteria NR | 2 | AID<br>GI Tract<br>Anxiety<br>Depression                                     | 6/9 |
| Li <sup>138</sup> (2012)                          | North America | US                      | Self-report                        | 3 | Sleep                                                                        | 4/8 |
| Lindgard <sup>139</sup> (1985)                    | Europe        | Sweden                  | Administrative data codes          | 1 | Diabetes<br>IHD<br>Hypertension<br>GI Tract<br>Alcohol abuse<br>Lung Disease | 5/8 |
| Liu <sup>140</sup> (2013)                         | Europe        | Sweden                  | Administrative data codes          | 1 | Cancer                                                                       | 3/9 |
| Lu <sup>141</sup> (2013)                          | North America | Canada/British Columbia | Poser, McDonald 2005               | 1 | Diabetes<br>Hypertension                                                     | 6/8 |
| Lobentanz <sup>142</sup> (2004)                   | Europe        | Austria/Vienna          | Self-report                        | 3 | Depression                                                                   | 6/9 |
| Lutterotti <sup>143</sup> (2011)                  | Europe        | Austria/Innsbruck       | McDonald 2005                      | 3 | Depression                                                                   | 4/8 |
| Manconi <sup>144</sup> (2007)                     | Europe        | Italy/Milan             | McDonald 2001                      | 4 | Sleep                                                                        | 5/9 |
| Manconi <sup>145</sup> (2008)                     | Europe        | Italy/Milan             | McDonald 2005                      | 4 | Sleep                                                                        | 6/9 |
| Maor <sup>146</sup> (2001)                        | Asia          | Israel                  | Neurologist diagnosed: criteria NR | 3 | Depression                                                                   | 3/9 |

|                                              |               |                 |                           |   |                                                                                                                                                                                       |     |
|----------------------------------------------|---------------|-----------------|---------------------------|---|---------------------------------------------------------------------------------------------------------------------------------------------------------------------------------------|-----|
| Marrie <sup>147, 148</sup> (2008) and (2011) | North America | US              | Self-report               | 2 | AID<br>Diabetes<br>Hypertension<br>Hyperlipidemia<br>GI Tract<br>Peripheral Vascular Disease<br>Visual disorders<br>Epilepsy<br>IHD<br>Lung Disease<br>Renal Disease<br>MSK<br>Cancer | 5/9 |
| Marrie <sup>149</sup> (2009)                 | North America | US              | Self-report               | 2 | Psychoses<br>Bipolar disorder<br>Anxiety<br>Alcohol abuse<br>Depression                                                                                                               | 5/9 |
| Marrie <sup>150</sup> (2011)                 | North America | US              | Self-report               | 2 | AID                                                                                                                                                                                   | 5/9 |
| Marrie <sup>151</sup> (2012)                 | North America | Canada/Manitoba | Administrative data codes | 1 | AID                                                                                                                                                                                   | 8/8 |
| Marrie <sup>152</sup> (2012)                 | North America | Canada/Manitoba | Administrative data codes | 1 | Diabetes<br>Hypertension<br>Hyperlipidemia                                                                                                                                            | 8/8 |
| Marrie <sup>153</sup> (2012)                 | North America | Canada/Manitoba | Administrative data codes | 1 | MSK                                                                                                                                                                                   | 8/8 |
| Marrie <sup>154</sup> (2013)                 | North America | Canada/Manitoba | Administrative data codes | 1 | AID<br>Epilepsy<br>Lung Disease                                                                                                                                                       | 8/8 |
| Marrie <sup>155</sup> (2013)                 | North America | Canada/Manitoba | Administrative data codes | 1 | IHD                                                                                                                                                                                   | 8/8 |

|                                          |               |                         |                           |   |                                                        |     |
|------------------------------------------|---------------|-------------------------|---------------------------|---|--------------------------------------------------------|-----|
| Marrie <sup>156</sup> (2013)             | North America | Canada/Manitoba         | Administrative data codes | 1 | Psychoses<br>Bipolar disorder<br>Anxiety<br>Depression | 8/8 |
| Marrosu <sup>157</sup> (2002)            | Europe        | Italy/Sardinia          | Poser                     | 2 | Diabetes                                               | 4/9 |
| Marrosu <sup>158</sup> (2004)            | Europe        | Italy/Sardinia          | Poser                     | 2 | Diabetes                                               | 3/9 |
| Martinez-Lapiscina <sup>159</sup> (2013) | Europe        | Spain                   | McDonald 2001 or 2005     | 2 | Epilepsy                                               | 5/8 |
| Mattioli <sup>160</sup> (2011)           | Europe        | Italy/Brescia           | McDonald 2005             | 3 | Depression                                             | 4/9 |
| McGuigan <sup>161</sup> (2006)           | Europe        | Ireland                 | Poser                     | 2 | Depression                                             | 3/9 |
| Merlino <sup>162</sup> (2009)            | Europe        | Italy/Udine             | McDonald 2001             | 3 | Anxiety<br>Depression                                  | 8/9 |
| Metz <sup>163</sup> (1989)               | North America | Canada/Alberta          | Poser                     | 2 | AID                                                    | 5/9 |
| Midgard <sup>164</sup> (1996)            | Europe        | Norway                  | McAlpine                  | 1 | Cancer                                                 | 7/8 |
| Midgard <sup>165</sup> (1996)            | Europe        | Norway/Hordaland County | Bauer                     | 4 | AID<br>Diabetes                                        | 6/9 |
| Miri <sup>166</sup> (2013)               | Asia          | Iran/Tehran             | McDonald 2001             | 4 | Sleep                                                  | 5/9 |
| Miro <sup>167</sup> (1990)               | Europe        | Spain                   | Poser                     | 2 | AID                                                    | 4/9 |
| Mohr <sup>168</sup> (2007)               | North America | US/Northern California  | Administrative data codes | 1 | Depression                                             | 7/8 |
| Moller <sup>169</sup> (1991)             | Europe        | Denmark                 | Administrative data codes | 1 | Cancer                                                 | 6/8 |

|                                    |                  |                |                                          |   |                        |     |
|------------------------------------|------------------|----------------|------------------------------------------|---|------------------------|-----|
| Montel <sup>170</sup> (2007)       | Europe           | France         | Poser                                    | 4 | Anxiety<br>Depression  | 5/9 |
| Monzani <sup>171</sup> (1999)      | North<br>America | Italy/Pisa     | Lublin                                   | 2 | AID                    | 3/9 |
| Moreau <sup>172</sup> (1998)       | Europe           | France/Dijon   | Poser                                    | 2 | Epilepsy               | 4/9 |
| Moreau <sup>173</sup> (2009)       | Europe           | France         | Poser                                    | 3 | Anxiety<br>Depression  | 6/9 |
| Moreira <sup>174</sup> (2008)      | South<br>America | Brazil         | Neurologist<br>diagnosed: criteria<br>NR | 3 | Sleep                  | 5/9 |
| Munteis <sup>175</sup> (2007)      | Europe           | Spain/Cataluña | McDonald 2001                            | 2 | AID                    | 4/9 |
| Nicholl <sup>176</sup> (2001)      | Europe           | UK/Nottingham  | Neurologist<br>diagnosed: criteria<br>NR | 3 | Anxiety<br>Depression  | 6/9 |
| Nicoletti <sup>177</sup> (2003)    | Europe           | Italy/Catania  | Poser                                    | 2 | Epilepsy               | 8/8 |
| Niederweiser <sup>178</sup> (2003) | Europe           | Austria/Graz   | Poser                                    | 2 | AID                    | 5/9 |
| Nielsen <sup>179</sup> (2006)      | Europe           | Denmark        | Allison or Poser                         | 1 | Cancer                 | 6/8 |
| Nielsen <sup>180</sup> (2008)      | Europe           | Denmark        | Allison or Poser                         | 1 | AID<br>IBD<br>GI Tract | 6/8 |
| Noseworthy <sup>181</sup> (1989)   | North<br>America | Canada/Ontario | Neurologist<br>diagnosed: criteria<br>NR | 2 | AID                    | 3/9 |
| Noy <sup>182</sup> (1995)          | Asia             | Israel         | Poser                                    | 3 | Anxiety<br>Depression  | 5/8 |



|                                                              |               |                |                           |   |                                                                                                                                                                                              |     |
|--------------------------------------------------------------|---------------|----------------|---------------------------|---|----------------------------------------------------------------------------------------------------------------------------------------------------------------------------------------------|-----|
| Nuyen <sup>183</sup> (2006)                                  | Europe        | Netherlands    | Administrative data codes | 1 | AID<br>Stroke<br>Diabetes<br>IHD<br>Hyperlipiemia<br>Visual disorders<br>Epilepsy<br>GI Tract<br>Lung Disease<br>Renal Disease<br>Cancer<br>Psychoses<br>Drug abuse<br>Anxiety<br>Depression | 5/8 |
| Nyquist <sup>184</sup> (2001)                                | North America | US/Minnesota   | Poser                     | 2 | Epilepsy                                                                                                                                                                                     | 7/8 |
| Olafsson <sup>185</sup> (1999)                               | Europe        | Iceland        | Poser                     | 2 | Epilepsy                                                                                                                                                                                     | 8/8 |
| Palo <sup>186</sup> (1977)                                   | Europe        | Finland        | Schumacher                | 1 | Cancer                                                                                                                                                                                       | 7/8 |
| Pandya <sup>187</sup> (2005)                                 | North America | Canada/Alberta | Poser                     | 4 | Depression                                                                                                                                                                                   | 3/8 |
| Patten <sup>188</sup> (2000) and Zabad <sup>189</sup> (2005) | North America | Canada/Alberta | Poser                     | 2 | Depression                                                                                                                                                                                   | 7/9 |
| Patten <sup>190</sup> (2003)                                 | North America | Canada         | Self-report               | 3 | Depression                                                                                                                                                                                   | 8/9 |
| Patten <sup>191</sup> (2005)                                 | North America | Canada/Alberta | Poser                     | 2 | Depression                                                                                                                                                                                   | 4/8 |
| Patten <sup>192</sup> (2005)                                 | North America | Canada/Alberta | Administrative data codes | 1 | Psychoses                                                                                                                                                                                    | 6/8 |

|                                          |               |                    |                                    |   |                                                                           |     |
|------------------------------------------|---------------|--------------------|------------------------------------|---|---------------------------------------------------------------------------|-----|
| Patten <sup>191</sup> (2005)             | North America | Canada/Alberta     | Administrative data codes          |   | Depression                                                                | 8/9 |
| Patten <sup>193</sup> (2010)             | North America | Canada/Alberta     | Poser                              | 2 | Depression                                                                | 5/9 |
| Patti <sup>194</sup> (2003)              | Europe        | Italy/Catania      | Neurologist diagnosed: criteria NR | 3 | Depression                                                                | 6/9 |
| Patti <sup>195</sup> (2007)              | Europe        | Italy              | Poser                              | 3 | Depression                                                                | 5/9 |
| Paz Soldan <sup>196</sup> (2012)         | North America | US/Minnesota       | Poser                              | 2 | Diabetes<br>Hypertension<br>Hyperlipidemia<br>Peripheral Vascular Disease | 6/8 |
| Pedotti <sup>197</sup> (2009)            | Europe        | Italy/Lombardi     | McDonald 2005                      | 4 | Lung Disease                                                              | 6/9 |
| Percy <sup>198</sup> (1971)              | North America | US/Minnesota       | Allison                            | 2 | Cancer<br>AID                                                             | 6/8 |
| Pittion-Vouyovitch <sup>199</sup> (2006) | Europe        | France/Nancy       | Poser                              | 3 | Depression                                                                | 7/9 |
| Pitzalis <sup>200</sup> (2008)           | Europe        | Italy/Sardinia     | NR                                 | 2 | Diabetes                                                                  | 1/9 |
| Poder <sup>201</sup> (2009)              | North America | Canada/Nova Scotia | McDonald 2005                      | 2 | Anxiety<br>Alcohol abuse<br>Depression                                    | 7/9 |
| Poirier <sup>202</sup> (1987)            | North America | Canada             | Schumacher                         | 4 | Sleep                                                                     | 2/9 |
| Ponsonby <sup>203</sup> (2006)           | Australia/NZ  | Australia/Tasmania | Poser and MRI                      | 4 | Lung Disease                                                              | 5/9 |
| Porcel <sup>204</sup> (2006)             | Europe        | Spain              | Neurologist diagnosed: criteria NR | 3 | Anxiety<br>Depression                                                     | 4/9 |

|                                         |               |                         |                                        |   |                                    |     |
|-----------------------------------------|---------------|-------------------------|----------------------------------------|---|------------------------------------|-----|
| Ramagopalan <sup>205</sup> (2007)       | North America | Canada                  | Poser or McDonald 2005                 | 2 | AID<br>IBD<br>Diabetes<br>GI Tract | 5/9 |
| Rodrigo <sup>206</sup> (2011)           | Europe        | Spain/Asturias          | McDonald 2005                          | 2 | AID<br>GI Tract                    | 5/9 |
| Romberg <sup>207</sup> (2008)           | Europe        | Finland                 | Poser                                  | 3 | Depression                         | 4/9 |
| Sadovnick <sup>208</sup> (1989)         | North America | Canada/British Columbia | Poser                                  | 2 | AID<br>GI Tract<br>Depression      | 4/8 |
| Sahraian <sup>209</sup> (2013)          | Asia          | Iran/Tehran             | McDonald 2005                          | 2 | Lung Disease                       | 5/9 |
| Salter <sup>210</sup> (2013)            | North America | US                      | Self-report                            | 2 | Visual disorders<br>AID            | 4/9 |
| Salvatore <sup>211</sup> (2004)         | Europe        | Italy/Varese            | Neurologist diagnosed: criteria NR     | 2 | AID<br>GI Tract                    | 5/9 |
| Sandberg-Wollheim <sup>212</sup> (1992) | Europe        | Sweden/Lund             | Poser                                  | 2 | AID                                | 1/9 |
| Scott <sup>213</sup> (1996)             | North America | US/Pennsylvania         | Poser                                  | 4 | Depression                         | 4/8 |
| Seyed Saadat <sup>214</sup> (2013)      | Asia          | Iran/Guilan             | McDonald 2005                          | 3 | Depression                         | 5/8 |
| Seyfert <sup>215</sup> (1990)           | Europe        | Germany/Berlin          | Neurologist-administered questionnaire | 2 | AID<br>IBD<br>Diabetes<br>GI Tract | 6/9 |
| Shaygannejad <sup>216</sup> (2013)      | Asia          | Iran/Isfahan            | McDonald 2005                          | 2 | Epilepsy<br>Sleep                  | 6/8 |
| Sheu <sup>217</sup> (2013)              | Asia          | Taiwan                  | Administrative data codes              | 1 | Diabetes<br>IHD                    | 5/8 |

|                                 |               |                                  |                                    |   | Hypertension<br>Hyperlipidemia<br>Lung Disease<br>Alcohol abuse |     |
|---------------------------------|---------------|----------------------------------|------------------------------------|---|-----------------------------------------------------------------|-----|
| Shiraishi <sup>218</sup> (2005) | Asia          | Japan/Kyoto                      | McDonald 2001                      | 2 | Epilepsy                                                        | 4/8 |
| Simioni <sup>219</sup> (2007)   | Europe        | Switzerland                      | McDonald 2001 or 2005              | 3 | Anxiety<br>Depression                                           | 5/9 |
| Sloka <sup>220</sup> (2005)     | North America | Canada/Newfoundland and Labrador | Neurologist diagnosed: criteria NR | 2 | AID                                                             | 7/9 |
| Smith <sup>221</sup> (2000)     | Europe        | UK/Liverpool                     | Neurologist diagnosed: criteria NR | 3 | Anxiety<br>Depression                                           | 3/9 |
| Soderberg <sup>222</sup> (2006) | Europe        | Sweden                           | Administrative data codes          | 1 | Hematologic malignancy                                          | 2/8 |
| Sokic <sup>223</sup> (2001)     | Europe        | Serbia                           | Poser                              | 2 | Epilepsy                                                        | 2/8 |
| Sollom <sup>224</sup> (2007)    | Europe        | UK                               | Self-report                        | 3 | Depression                                                      | 6/8 |
| Solomon <sup>225</sup> (2013)   | North America | US/Oregon                        | McDonald 2005                      | 2 | AID                                                             | 4/8 |
| Somer <sup>226</sup> (1989)     | Europe        | Finland                          | Schumacher                         | 2 | IBD                                                             | 3/9 |
| Spain <sup>227</sup> (2007)     | Australia/NZ  | Australia/Victoria               | Poser                              | 3 | Anxiety<br>Depression                                           | 6/8 |
| Striano <sup>228</sup> (2003)   | Europe        | Italy/Naples                     | McDonald 2001                      | 2 | Epilepsy                                                        | 4/8 |
| Sumelahti <sup>229</sup> (2004) | Europe        | Finland                          | Poser                              | 1 | Cancer                                                          | 7/8 |

|                                  |               |                     |                           |   |                                             |     |
|----------------------------------|---------------|---------------------|---------------------------|---|---------------------------------------------|-----|
| Sun <sup>230</sup> (2013)        | Asia          | Taiwan              | Administrative data codes | 1 | Hypertension<br>Hyperlipidemia<br>Cancer    | 5/8 |
| Sundgren <sup>231</sup> (2013)   | Europe        | Sweden/Stockholm    | McDonald 2005             | 3 | Depression                                  | 4/9 |
| Sunesen <sup>232</sup> (2010)    | Europe        | Denmark             | Administrative data codes | 1 | Cancer                                      | 6/8 |
| Tachibana <sup>233</sup> (1994)  | Europe        | England/London      | McDonald 1986             | 3 | Sleep                                       | 3/8 |
| Tanriverdi <sup>234</sup> (2010) | Europe        | Turkey              | Poser                     | 3 | Depression                                  | 5/8 |
| Tarrants <sup>235</sup> (2011)   | North America | US                  | Administrative data codes | 1 | Depression                                  | 3/8 |
| Thielscher <sup>206</sup> (2013) | Europe        | Germany             | Administrative data codes | 1 | Depression                                  | 4/8 |
| Till <sup>207</sup> (2012)       | North America | Canada/Toronto      | McDonald 2005             | 3 | Anxiety<br>Depression                       | 5/9 |
| Tourbah <sup>236</sup> (1998)    | Europe        | France/Paris        | Poser                     | 2 | AID                                         | 3/8 |
| Tremlett <sup>237</sup> (2002)   | Europe        | Wales               | Administrative data codes | 1 | AID<br>Diabetes<br>GI Tract<br>Lung Disease | 6/8 |
| Trouillas <sup>238</sup> (1971)  | Europe        | France/Lyon         | NR                        | 2 | Epilepsy                                    | 0/9 |
| Turner <sup>239</sup> (2009)     | North America | US                  | Administrative data codes | 1 | Alcohol                                     | 5/9 |
| Turpin <sup>240</sup> (2007)     | North America | Canada/Saskatchewan | GP and drug plan          | 3 | MSK                                         | 5/9 |

|                                        |               |                       |                                    |   |                           |     |
|----------------------------------------|---------------|-----------------------|------------------------------------|---|---------------------------|-----|
| Uribe-San Martin <sup>241</sup> (2014) | South America | Chile                 | McDonald 2010                      | 2 | Epilepsy                  | 6/8 |
| Valleroy <sup>242</sup> (1984)         | North America | US/Washington         | Self-report                        | 3 | Depression                | 3/9 |
| Vavrova <sup>215</sup> (2012)          | Europe        | Czech Republic/Prague | McDonald 2001                      | 4 | Sleep                     | 6/9 |
| Viveiros <sup>243</sup> (2010)         | South America | Brazil/Rio de Janeiro | McDonald 2001 or 2005              | 2 | Epilepsy                  | 3/9 |
| Vogt <sup>244</sup> (2009)             | Europe        | Switzerland           | McDonald 2005                      | 3 | Depression                | 4/8 |
| Warren <sup>245</sup> (2009)           | North America | Canada                | Self-report                        | 3 | Hypertension              | 4/8 |
| Wertman <sup>246</sup> (1992)          | Asia          | Israel                | Rose                               | 2 | Diabetes                  | 4/9 |
| Williams <sup>247</sup> (2005)         | North America | US/Washington         | Administrative data codes          | 1 | Depression                | 7/9 |
| Wood <sup>248</sup> (2013)             | Australia/NZ  | Australia/Tasmania    | McDonald 2001                      | 3 | Anxiety<br>Depression     | 5/8 |
| Wynn <sup>249</sup> (1990)             | North America | US/Minnesota          | Poser                              | 2 | AID<br>Diabetes<br>Cancer | 3/8 |
| Zettl <sup>250</sup> (2013)            | Europe        | Germany               | Neurologist diagnosed: criteria NR | 3 | Depression                | 4/9 |
| Zorzon <sup>251</sup> (2001)           | Europe        | Italy/Trieste         | Poser                              | 4 | Depression                | 5/9 |
| Zorzon <sup>252</sup> (2003)           | Europe        | Italy/Trieste         | McDonald 2001                      | 2 | AID                       | 4/9 |

1. Achiron A, Barak Y, Gail M, et al. Cancer incidence in multiple sclerosis and effects of immunomodulatory treatments. *Breast Cancer Research and Treatment* 2005;89:265-270.
2. Allen NB, Lichtman JH, Cohen HW, Fang J, Brass LM, Alderman MH. Vascular disease among hospitalized multiple sclerosis patients. *Neuroepidemiology* 2008;30:234-238.
3. Allen AN, Seminog OO, Goldacre MJ. Association between multiple sclerosis and epilepsy: large population-based record-linkage studies. *BMC Neurol* 2013;13:189.
4. Alschuler KN, Jensen MP, Ehde DM. The association of depression with pain-related treatment utilization in patients with multiple sclerosis. *Pain Med* 2012;13:1648-1657.
5. Amato MP, Ponziani G, Rossi F, Liedl CL, Stefanile C, Rossi L. Quality of life in multiple sclerosis: the impact of depression, fatigue and disability. *Mult Scler* 2001;7:340-344.
6. Annunziata P, De Santi L, Di Rezze S, et al. Clinical features of Sjogren's syndrome in patients with multiple sclerosis. *Acta Neurol Scand* 2011;124:109-114.
7. Auger C, Montplaisir J, Duquette P. Increased frequency of restless legs syndrome in a French-Canadian population with multiple sclerosis. *Neurology* 2005;65:1652-1653.
8. Avasarala JR, Cross AH, Trinkaus K. Comparative assessment of Yale Single Question and Beck Depression Inventory Scale in screening for depression in multiple sclerosis. *Multiple Sclerosis* 2003;9:307-310.
9. Bahmanyar S, Montgomery SM, Hillert J, Ekbom A, Olsson T. Cancer risk among patients with multiple sclerosis and their parents. *Neurology* 2009;72:1170-1177.

10. Baker HWG, Balla JI, Burger HG, Ebeling P, Mackay IR. Multiple sclerosis and autoimmune diseases. *Australian and New Zealand Journal of Medicine* 1972;2:256-260.
11. Bamer AM, Johnson KL, Amtmann D, Kraft GH. Prevalence of sleep problems in individuals with multiple sclerosis. *Multiple Sclerosis* 2008;14:1127-1130.
12. Barcellos LF, Kamdar BB, Ramsay PP, et al. Clustering of autoimmune diseases in families with a high-risk for multiple sclerosis: a descriptive study. *Lancet Neurology* 2006;5:924-931.
13. Basiri K, Etemadifar M, Maghzi AH, Zarghami N. Frequency of myasthenia gravis in multiple sclerosis: Report of five cases from Isfahan, Iran. *Neurol India* 2009;57:638-640.
14. Baumstarck-Barrau K, Simeoni MC, Reuter F, et al. Cognitive function and quality of life in multiple sclerosis patients: a cross-sectional study. *BMC Neurol* 2011;11:17.
15. Bazelier MT, Mueller-Schotte S, Leufkens HG, Uitdehaag BM, van Staa T, de Vries F. Risk of cataract and glaucoma in patients with multiple sclerosis. *Mult Scler* 2012;18:628-638.
16. Beiske AG, Svensson E, Sandanger I, et al. Depression and anxiety amongst multiple sclerosis patients. *European Journal of Neurology* 2008;15:239-245.
17. Bergamaschi R, Villani S, Crabbio M, et al. Inverse relationship between multiple sclerosis and allergic respiratory diseases. *Neurological Sciences* 2009;30:115-118.
18. Bloomgren G, Sperling B, Cushing K, Wenten M. Assessment of malignancy risk in patients with multiple sclerosis treated with intramuscular interferon beta-1a: retrospective evaluation using a health insurance claims database and postmarketing surveillance data. *Ther Clin Risk Manag* 2012;8:313-321.
19. Bodini B, Mandarelli G, Tomassini V, et al. Alexithymia in multiple sclerosis: relationship with fatigue and depression. *Acta Neurol Scand* 2008;118:18-23.
20. Bombardier CH, Blake KD, Ehde DM, Gibbons LE, Moore D, Kraft GH. Alcohol and drug abuse among persons with multiple sclerosis. *Multiple Sclerosis* 2004;10:35-40.
21. Borhani Haghghi A, Ansari N, Mokhtari M, Geramizadeh B, Lankarani KB. Multiple sclerosis and gluten sensitivity. *Clin Neurol Neurosurg* 2007;109:651-653.
22. Brajkovic L, Bras M, Milunovic V, et al. The connection between coping mechanisms, depression, anxiety and fatigue in multiple sclerosis. *Coll Antropol* 2009;33 Suppl 2:135-140.
23. Braley TJ, Segal BM, Chervin RD. Sleep-disordered breathing in multiple sclerosis. *Neurology* 2012;79:929-936.
24. Brichetto G, Uccelli MM, Mancardi GL, Solaro C. Symptomatic medication use in multiple sclerosis. *Multiple Sclerosis* 2003;9:458-460.
25. Brown T. Measuring up rates for adverse health behaviors in MS. *Multiple Sclerosis* 2009.



26. Buchanan RJ, Wang S, Tai-Seale M, Ju H. Analyses of nursing home residents with multiple sclerosis and depression using the Minimum Data Set. *Multiple Sclerosis* 2003;9:171-188.
27. Buchanan RJ, Schiffer R, Stuifbergen A, et al. Demographic and disease characteristics of people with multiple sclerosis living in urban and rural areas. *International Journal of MS Care* 2006;8:89-98.
28. Buchanan RJ, Zuniga MA, Carrillo-Zuniga G, et al. A pilot study of Latinos with multiple sclerosis: demographic, disease, mental health, and psychosocial characteristics. *J Soc Work Disabil Rehabil* 2011;10:211-231.
29. Burns MN, Nawacki E, Siddique J, Pelletier D, Mohr DC. Prospective examination of anxiety and depression before and during confirmed and pseudoexacerbations in patients with multiple sclerosis. *Psychosom Med* 2013;75:76-82.
30. Carta MG, Moro MF, Loreface L, et al. The risk of Bipolar Disorders in Multiple Sclerosis. *J Affect Disord* 2014;155:255-260.
31. Catenox H, Marignier R, Ritleng C, et al. Multiple sclerosis and epileptic seizures. *Mult Scler* 2011;17:96-102.
32. Cendrowski W, Majkowski J. Epilepsy in multiple sclerosis. *J Neurol Sci* 1972;17:389-398.
33. Cendrowski W. Multiple sclerosis and diseases of autoimmune or related origin. *Mater Med Pol* 1989;21:327-329.
34. Cetin K, Johnson KL, Ehde DM, Kuehn CM, Amtmann D, Kraft GH. Antidepressant use in multiple sclerosis: epidemiologic study of a large community sample. *Mult Scler* 2007;13:1046-1053.
35. Cheng MY, Wai YY, Ro LS, Wu T. Seizures and multiple sclerosis in Chinese patients: a clinical and magnetic resonance imaging study. *Epilepsy Res* 2012;101:166-173.
36. Christiansen CF, Christensen S, Farkas DK, Miret M, Sørensen HT, Pedersen L. Risk of arterial cardiovascular diseases in patients with multiple sclerosis: a population-based cohort study. *Neuroepidemiology* 2010;35:267-274.
37. Chwastiak L, Ehde DM, Gibbons LE, Sullivan M, Bowen JD, Kraft GH. Depressive symptoms and severity of illness in multiple sclerosis: Epidemiologic study of a large community sample. *American Journal of Psychiatry* 2002;159:1862-1868.
38. da Silva AM, Vilhena E, Lopes A, et al. Depression and anxiety in a Portuguese MS population: associations with physical disability and severity of disease. *J Neurol Sci* 2011;306:66-70.
39. Dahl O-P, Stordal E, Lydersen S, Midgard R. Anxiety and depression in multiple sclerosis. A comparative population-based study in Nord-Trøndelag County, Norway. *Multiple Sclerosis* 2009;15:1495-1501.
40. Dallmeijer AJ, Beckerman H, de Groot V, van de Port IGL, Lankhorst GJ, Dekker J. Long-term effect of comorbidity on the course of physical functioning in patients after stroke and with multiple sclerosis. *Journal of Rehabilitation Medicine* 2009;41:322-326.
41. De Keyser J. Autoimmunity in multiple sclerosis. *Neurology* 1988;38:371-374.
42. de Seze J, Canva-Delcambre V, Fajardy I, et al. Autoimmune hepatitis and multiple sclerosis: a coincidental association? *Mult Scler* 2005;11:691-693.

43. Demakis GJ, Buchanan R, Dewald L. A longitudinal study of cognition in nursing home residents with multiple sclerosis. *Disabil Rehabil* 2009;31:1734-1741.
44. Deretzi G, Kountouras J, Koutlas E, et al. Familial prevalence of autoimmune disorders in multiple sclerosis in Northern Greece. *Mult Scler* 2010;16:1091-1101.
45. Deriu M, Cossu G, Molari A, et al. Restless legs syndrome in multiple sclerosis: A case-control study. *Movement Disorders* 2009;24:697-701.
46. Dias RA, Hardin KA, Rose H, Agius MA, Apperson ML, Brass SD. Sleepiness, fatigue, and risk of obstructive sleep apnea using the STOP-BANG questionnaire in multiple sclerosis: a pilot study. *Sleep Breath* 2012;16:1255-1265.
47. Drake WE, Jr., Macrae D. Epilepsy in multiple sclerosis. *Neurology* 1961;11:810-816.
48. Durelli L, Oggero A, Verdun E, et al. Thyroid function and anti-thyroid antibodies in MS patients screened for interferon treatment. A multicenter study. *J Neurol Sci* 2001;193:17-22.
49. Durmus H, Kurtuncu M, Tuzun E, et al. Comparative clinical characteristics of early- and adult-onset multiple sclerosis patients with seizures. *Acta Neurol Belg* 2013;113:421-426.
50. Eaton WW, Rose NR, Kalaydjian A, Pedersen MG, Mortensen PB. Epidemiology of autoimmune diseases in Denmark. *Journal of Autoimmunity* 2007;29:1-9.
51. Edwards LJ, Constantinescu CS. A prospective study of conditions associated with multiple sclerosis in a cohort of 658 consecutive outpatients attending a multiple sclerosis clinic. *Multiple Sclerosis* 2004;10:575-581.
52. Einarsson U, Gottberg K, Fredrikson S, Bergendal G, von Koch L, Holmqvist LW. Multiple sclerosis in Stockholm County. A pilot study exploring the feasibility of assessment of impairment, disability and handicap by home visits. *Clin Rehabil* 2003;17:294-303.
53. Engelsen BA, Gronning M. Epileptic seizures in patients with multiple sclerosis. Is the prognosis of epilepsy underestimated? *Seizure* 1997;6:377-382.
54. Eriksson M, Ben-Menachem E, Andersen O. Epileptic seizures, cranial neuralgias and paroxysmal symptoms in remitting and progressive multiple sclerosis. *Multiple Sclerosis* 2002;8:495-499.
55. Espinola-Nadurille M, Colin-Piana R, Ramirez-Bermudez J, et al. Mental disorders in Mexican patients with multiple sclerosis. *J Neuropsychiatry Clin Neurosci* 2010;22:63-69.
56. Etemadifar M, Abtahi SH, Tabrizi N. Epileptic seizures in early-onset multiple sclerosis. *Arch Iran Med* 2012;15:381-383.
57. Etemadifar M, Abtahi SH, Roomizadeh P. Epileptic seizures in multiple sclerosis: a population-based survey in Iran. *Acta Neurol Belg* 2013;113:271-278.
58. Fanouriakis A, Mastorodemos V, Pamfil C, et al. Coexistence of systemic lupus erythematosus and multiple sclerosis: Prevalence, clinical characteristics, and natural history. *Semin Arthritis Rheum* 2013.

59. Feinstein A, O'Connor P, Feinstein K. Multiple sclerosis, interferon beta-1b and depression: A prospective investigation. *J Neurol* 2002;249:815-820.
60. Feinstein A. An examination of suicidal intent in patients with multiple sclerosis. *Neurology* 2002;59:674-678.
61. Korostil M, Feinstein A. Anxiety disorders and their clinical correlates in multiple sclerosis patients. *Multiple Sclerosis* 2007;13:67-72.
62. Ferini-Strambi L, Filippi M, Martinelli V, et al. Nocturnal sleep study in multiple sclerosis: correlations with clinical and brain magnetic resonance imaging findings. *J Neurol Sci* 1994;125:194-197.
63. Ferrando SJ, Samton J, Mor N, Nicora S, Findler M, Apatoff B. Patient Health Questionnaire-9 to Screen for Depression in Outpatients With Multiple Sclerosis. *International Journal of MS Care* 2007;9:99-103.
64. Finlayson M, Preissner K, Cho C. Impact of Comorbidity on Fatigue Management Intervention Outcomes Among People with Multiple Sclerosis. *International Journal of MS Care* 2013;15:21-26.
65. Fisk JD, Morehouse SA, Brown MG, Skedgel C, Murray TJ. Hospital-based psychiatric service utilization and morbidity in multiple sclerosis. *Can J Neurol Sci* 1998;25:230-235.
66. Fleming ST, Blake Jr RL. Patterns of comorbidity in elderly patients with multiple sclerosis. *J Clin Epidemiol* 1994;47:1127-1132.
67. Forbes A, While A, Mathes L, Griffiths P. Health problems and health-related quality of life in people with multiple sclerosis. *Clin Rehabil* 2006;20:67-78.
68. Foroughipour M, Behdani F, Hebrani P, Marvast MN, Esmatinia F, Akhavanrezayat A. Frequency of obsessive-compulsive disorder in patients with multiple sclerosis: A cross-sectional study. *J Res Med Sci* 2012;17:248-253.
69. Fragoso YD, Finkelsztejn A, Gomes S, et al. Restless legs syndrome and multiple sclerosis: a Brazilian multicenter study and meta-analysis of the literature. *Arq Neuropsiquiatr* 2011;69:180-183.
70. Fromont A, Binquet C, Rollot F, et al. Comorbidities at multiple sclerosis diagnosis. *J Neurol* 2013;260:2629-2637.
71. Fuvesi J, Bencsik K, Losonczi E, et al. Factors influencing the health-related quality of life in Hungarian multiple sclerosis patients. *J Neurol Sci* 2010;293:59-64.
72. Galeazzi G, Ferrari S, Giaroli G, et al. Psychiatric disorders and depression in multiple sclerosis outpatients: impact of disability and interferon beta therapy. *Neurological Sciences* 2005;26:255-262.
73. Gambardella A, Valentino P, Labate A, et al. Temporal lobe epilepsy as a unique manifestation of multiple sclerosis. *Can J Neurol Sci* 2003;30:228-232.
74. Garfield AC, Lincoln NB. Factors affecting anxiety in multiple sclerosis. *Disabil Rehabil* 2012;34:2047-2052.

75. Ghadirian P, Dadgostar B, Azani R, Maisonneuve P. A case-control study of the association between sociodemographic, lifestyle and medical history factors and multiple sclerosis. *Canadian Journal of Public Health Revue Canadienne de Sante Publique* 2001;92:281-285.
76. Ghajarzadeh M, Sahraian MA, Fateh R, Daneshmand A. Fatigue, depression and sleep disturbances in Iranian patients with multiple sclerosis. *Acta Med Iran* 2012;50:244-249.
77. Ghezzi A, Montanini R, Basso PF, Zaffaroni M, Massimo E, Cazzullo CL. Epilepsy in multiple sclerosis. *Eur Neurol* 1990;30:218-223.
78. Gold SM, Schulz H, Monch A, Schulz KH, Heesen C. Cognitive impairment in multiple sclerosis does not affect reliability and validity of self-report health measures. *Multiple Sclerosis* 2003;9:404-410.
79. Goldacre MJ, Seagroatt V, Yeates D, Acheson ED. Skin cancer in people with multiple sclerosis: a record linkage study. *Journal of Epidemiology and Community Health* 2004;58:142-144.
80. Gomez-Choco M, Iranzo A, Blanco Y, Graus F, Santamaria J, Saiz A. Prevalence of restless legs syndrome and REM sleep behavior disorder in multiple sclerosis. *Multiple Sclerosis* 2007;13:805-808.
81. Goodin DS. Survey of multiple sclerosis in northern California. Northern California MS Study Group. *Multiple Sclerosis* 1999;5:78-88.
82. Goretti B, Portaccio E, Zipoli V, et al. Coping strategies, psychological variables and their relationship with quality of life in multiple sclerosis. *Neurol Sci* 2009;30:15-20.
83. Goretti B, Ghezzi A, Portaccio E, et al. Psychosocial issue in children and adolescents with multiple sclerosis. *Neurol Sci* 2010;31:467-470.
84. Gottberg K, Einarsson U, Fredrikson S, von Koch L, Holmqvist LW. A population-based study of depressive symptoms in multiple sclerosis in Stockholm county: association with functioning and sense of coherence. *J Neurol Neurosurg Psychiatry* 2007;78:60-65.
85. Hakim EA, Bakheit AM, Bryant TN, et al. The social impact of multiple sclerosis--a study of 305 patients and their relatives. *Disabil Rehabil* 2000;22:288-293.
86. Hanrahan PS, Russell AS, McLean DR. Ankylosing spondylitis and multiple sclerosis: an apparent association? *J Rheumatol* 1988;15:1512-1514.
87. Harel Y, Barak Y, Achiron A. Dysregulation of affect in multiple sclerosis: new phenomenological approach. *Psychiatry Clin Neurosci* 2007;61:94-98.
88. Hemminki K, Liu X, Ji J, Sundquist K, Sundquist J. Subsequent COPD and lung cancer in patients with autoimmune disease. *European Respiratory Journal* 2011;37:463-465.

89. Hemminki K, Liu X, Forsti A, Ji J, Sundquist J, Sundquist K. Effect of autoimmune diseases on incidence and survival in subsequent multiple myeloma. *Journal of Hematology & Oncology* 2012;5:59.
90. Hemminki K, Liu X, Ji J, Sundquist J, Sundquist K. Autoimmune disease and subsequent digestive tract cancer by histology. *Annals of Oncology* 2012;23:927-933.
91. Hemminki K, Liu X, Forsti A, Ji J, Sundquist J, Sundquist K. Subsequent brain tumors in patients with autoimmune disease. *Neuro Oncol* 2013;15:1142-1150.
92. Hemminki K, Liu X, Försti A, Ji J, Sundquist J, Sundquist K. Subsequent leukaemia in autoimmune disease patients. *British Journal of Haematology* 2013;161:677-687.
93. Henderson RD, Bain CJ, Pender MP. The occurrence of autoimmune diseases in patients with multiple sclerosis and their families. *Journal of Clinical Neuroscience* 2000;7:434-437.
94. Hjalgrim H, Rasmussen S, Rostgaard K, et al. Familial clustering of Hodgkin lymphoma and multiple sclerosis. *J Natl Cancer Inst* 2004;96:780-784.
95. Holper L, Coenen M, Weise A, Stucki G, Cieza A, Kesselring J. Characterization of functioning in multiple sclerosis using the ICF. *J Neurol* 2010;257:103-113.
96. Hopman WM, Coo H, Edgar CM, McBride EV, Day AG, Brunet DG. Factors associated with health-related quality of life in multiple sclerosis. *Can J Neurol Sci* 2007;34:160-166.
97. Hoppenbrouwers IA, Cortes LM, Aulchenko YS, et al. Familial clustering of multiple sclerosis in a Dutch genetic isolate. *Mult Scler* 2007;13:17-24.
98. Horton M, Rudick RA, Hara-Cleaver C, Marrie RA. Validation of a Self-Report Comorbidity Questionnaire for Multiple Sclerosis. *Neuroepidemiology* 2010;35:83-90.
99. Hussein WI, Reddy SS. Prevalence of diabetes in patients with multiple sclerosis. *Diabetes Care* 2006;29:1984-1985.
100. Jadidi E, Mohammadi M, Moradi T. High risk of cardiovascular diseases after diagnosis of multiple sclerosis. *Multiple Sclerosis Journal* 2013;19:1336-1340.
101. Janardhan V, Bakshi R. Quality of life in patients with multiple sclerosis: the impact of fatigue and depression. *J Neurol Sci* 2002;205:51-58.
102. Janssens ACJW, van Doorn PA, de Boer JB, et al. Anxiety and depression influence the relation between disability status and quality of life in multiple sclerosis. *Multiple Sclerosis* 2003;9:397-403.
103. Siepman TA, Janssens AC, de Koning I, Polman CH, Boringa JB, Hintzen RQ. The role of disability and depression in cognitive functioning within 2 years after multiple sclerosis diagnosis. *J Neurol* 2008;255:910-916.
104. Janssens AC, Buljevac D, van Doorn PA, et al. Prediction of anxiety and distress following diagnosis of multiple sclerosis: a two-year longitudinal study. *Mult Scler* 2006;12:794-801.

105. Joffe RT, Lippert GP, Gray TA, Sawa G, Horvath Z. Mood disorder and multiple sclerosis. *Archives of Neurology* 1987;44:376-378.
106. Johansson S, Ytterberg C, Claesson IM, et al. High concurrent presence of disability in multiple sclerosis. Associations with perceived health. *J Neurol* 2007;254:767-773.
107. Johansson S, Ytterberg C, Hillert J, Widen Holmqvist L, von Koch L. A longitudinal study of variations in and predictors of fatigue in multiple sclerosis. *J Neurol Neurosurg Psychiatry* 2008;79:454-457.
108. Jonsson A, Dock J, Ravnborg MH. Quality of life as a measure of rehabilitation outcome in patients with multiple sclerosis. *Acta Neurol Scand* 1996;93:229-235.
109. Julian LJ, Vella L, Frankel D, Minden SL, Oksenberg JR, Mohr DC. ApoE alleles, depression and positive affect in multiple sclerosis. *Mult Scler* 2009;15:311-315.
110. Khan F, Pallant J, Brand C. Caregiver strain and factors associated with caregiver self-efficacy and quality of life in a community cohort with multiple sclerosis. *Disabil Rehabil* 2007;29:1241-1250.
111. Kaminska M, Kimoff RJ, Benedetti A, et al. Obstructive sleep apnea is associated with fatigue in multiple sclerosis. *Mult Scler* 2012;18:1159-1169.
112. Kang J-H, Chen Y-H, Lin H-C. Comorbidities amongst patients with multiple sclerosis: a population-based controlled study. *European Journal of Neurology* 2010;17:1215-1219.
113. Kanjwal K, Karabin B, Kanjwal Y, Grubb BP. Autonomic Dysfunction Presenting as Postural Orthostatic Tachycardia Syndrome in Patients with Multiple Sclerosis. *International Journal of Medical Sciences* 2010;7:62-67.
114. Karara AM, Macky TA, Sharawy MH. Pattern of uveitis in an Egyptian population with multiple sclerosis: a hospital-based study. *Ophthalmic Res* 2013;49:25-29.
115. Kargarfard M, Eetemadifar M, Mehrabi M, Maghzi AH, Hayatbakhsh MR. Fatigue, depression, and health-related quality of life in patients with multiple sclerosis in Isfahan, Iran. *Eur J Neurol* 2012;19:431-437.
116. Karimi P, Modarresi SZ, Sahraian MA, et al. The relation of multiple sclerosis with allergy and atopy: a case control study. *Iran J Allergy Asthma Immunol* 2013;12:182-189.
117. Karni A, Abramsky O. Association of MS with thyroid disorders. *Neurology* 1999;53:883-885.
118. Kehler MD, Hadjistavropoulos HD. Is health anxiety a significant problem for individuals with multiple sclerosis? *J Behav Med* 2009;32:150-161.
119. Ketelslegers IA, Catsman-Berrevoets CE, Boon M, et al. Fatigue and depression in children with multiple sclerosis and monophasic variants. *Eur J Paediatr Neurol* 2010;14:320-325.
120. Kingwell E, van der Kop M, Zhao Y, et al. Relative mortality and survival in multiple sclerosis: findings from British Columbia, Canada. *Journal of Neurology, Neurosurgery & Psychiatry* 2012;83:61-66.

121. Kinnunen E, Wikstrom J. Prevalence and prognosis of epilepsy in patients with multiple sclerosis. *Epilepsia* 1986;27:729-733.
122. Klevan G, Jacobsen CO, Aarseth JH, et al. Health related quality of life in patients recently diagnosed with multiple sclerosis. *Acta Neurol Scand* 2014;129:21-26.
123. Koshiol J, Lam TK, Gridley G, Check D, Brown LM, Landgren O. Racial differences in chronic immune stimulatory conditions and risk of non-Hodgkin's lymphoma in veterans from the United States. *J Clin Oncol* 2011;29:378-385.
124. Krokki O, Bloigu R, Ansakorpi H, Reunanen M, Remes AM. Neurological comorbidity and survival in multiple sclerosis. *Multiple Sclerosis and Related Disorders* 2013;3:72-77.
125. Landgren AM, Landgren O, Gridley G, Dores GM, Linet MS, Morton LM. Autoimmune disease and subsequent risk of developing alimentary tract cancers among 4.5 million US male veterans. *Cancer* 2011;117:1163-1171.
126. Langer-Gould A, Albers K, Van Den Eeden S, Nelson L. Autoimmune diseases prior to the diagnosis of multiple sclerosis: a population-based case-control study. *Multiple Sclerosis* 2010;16:855-861.
127. Laroni A, Calabrese M, Perini P, et al. Multiple sclerosis and autoimmune diseases: Epidemiology and HLA-DR association in North-east Italy. *Journal of Neurology* 2006;253:636-639.
128. Lavela SL, Prohaska TR, Furner S, Weaver FM. Chronic diseases in male veterans with multiple sclerosis. *Prev Chronic Dis* 2012;9:E55.
129. Lawrenson R, Wyndaele JJ, Vlachonikolis I, Farmer C, Glickman S. Renal failure in patients with neurogenic lower urinary tract dysfunction. *Neuroepidemiology* 2001;20:138-143.
130. Le Scanneff J, Seve P, Renoux C, Broussolle C, Confavreux C, Vukusic S. Uveitis associated with multiple sclerosis. *Mult Scler* 2008;14:415-417.
131. Lebrun C, Debouverie M, Vermersch P, et al. Cancer risk and impact of disease-modifying treatments in patients with multiple sclerosis. *Mult Scler* 2008;14:399-405.
132. Lebrun C, Vermersch P, Brassat D, et al. Cancer and multiple sclerosis in the era of disease-modifying treatments. *J Neurol* 2011;258:1304-1311.
133. Lehan T, Arango-Lasprilla JC, Macias MA, Aguayo A, Villasenor T. Distress associated with patients' symptoms and depression in a sample of Mexican caregivers of individuals with MS. *Rehabil Psychol* 2012;57:301-307.
134. Leonavicius R, Adomaitiene A, Leskauskas D. The relationships between depression and life activities and well-being of multiple sclerosis patients. *Central European Journal of Medicine* 2011;6:652-661.
135. Leonavicius R, Adomaitiene A. Impact of depression on multiple sclerosis patients. *Central European Journal of Medicine* 2012;7:685-690.
136. Leonavicius R, Adomaitiene A. Anxiety and social activities in multiple sclerosis patients. *Central European Journal of Medicine* 2013;8:56-61.

137. Levinthal DJ, Rahman A, Nusrat S, O'Leary M, Heyman R, Bielefeldt K. Adding to the burden: gastrointestinal symptoms and syndromes in multiple sclerosis. *Mult Scler Int* 2013;2013:319201.
138. Li Y, Munger KL, Batool-Anwar S, De Vito K, Ascherio A, Gao X. Association of multiple sclerosis with restless legs syndrome and other sleep disorders in women. *Neurology* 2012;78:1500-1506.
139. Lindegard B. Diseases associated with multiple sclerosis and epilepsy. *Acta Neurologica Scandinavica* 1985;71:267-277.
140. Liu X, Ji J, Forsti A, Sundquist K, Sundquist J, Hemminki K. Autoimmune Disease and Subsequent Urological Cancer. *The Journal of Urology* 2013;189:2262-2268.
141. Lu E, Zhao Y, Zhu F, et al. Birth hospitalization in mothers with multiple sclerosis and their newborns. *Neurology* 2013;80:447-452.
142. Lobentanz IS, Asenbaum S, Vass K, et al. Factors influencing quality of life in multiple sclerosis patients: disability, depressive mood, fatigue and sleep quality. *Acta Neurologica Scandinavica* 2004;110:6-13.
143. Lutterotti A, Vedovello M, Reindl M, et al. Olfactory threshold is impaired in early, active multiple sclerosis. *Mult Scler* 2011;17:964-969.
144. Manconi M, Fabbrini M, Bonanni E, et al. High prevalence of restless legs syndrome in multiple sclerosis. *European Journal of Neurology* 2007;14:534-539.
145. Manconi M, Ferini-Strambi L, Filippi M, et al. Multicenter case-control study on restless legs syndrome in multiple sclerosis: the REMS study. *Sleep* 2008;31:944-952.
146. Maor Y, Olmer L, Mozes B. The relation between objective and subjective impairment in cognitive function among multiple sclerosis patients - the role of depression. *Multiple Sclerosis* 2001;7:131-135.
147. Marrie RA, Horwitz R, Cutter G, Tyry T, Campagnolo D, Vollmer T. Comorbidity, socioeconomic status, and multiple sclerosis. *Multiple Sclerosis* 2008;14:1091-1098.
148. Marrie RA, Horwitz RI, Cutter G, Tyry T, Vollmer T. Association between comorbidity and clinical characteristics of MS. *Acta Neurologica Scandinavica* 2011;124:135-141.
149. Marrie RA, Horwitz RI, Cutter G, Tyry T, Campagnolo D, Vollmer T. The burden of mental comorbidity in multiple sclerosis: Frequent, underdiagnosed, and under-treated. *Multiple Sclerosis* 2009;15:385-392.
150. Marrie RA, Horwitz RI, Cutter G, Tyry T, Vollmer T. Smokers with multiple sclerosis are more likely to report comorbid autoimmune diseases. *Neuroepidemiology* 2011;36:85-90.
151. Marrie RA, Yu BN, Leung S, et al. The incidence and prevalence of thyroid disease do not differ in the multiple sclerosis and general populations: A validation study using administrative data. *Neuroepidemiology* 2012;39:135-142.
152. Marrie RA, Yu B, Leung S, et al. Rising prevalence of vascular comorbidities in MS: validation of administrative definitions for diabetes, hypertension, hyperlipidemia. *Mult Scler* 2012;18:1310-1319.



153. Marrie RA, Yu BN, Leung S, et al. The incidence and prevalence of fibromyalgia are higher in multiple sclerosis than the general population: A population-based study. *Multiple Sclerosis and Related Disorders* 2012;1:162-167.
154. Marrie RA, Yu BN, Leung S, et al. The Utility of Administrative Data for Surveillance of Comorbidity in Multiple Sclerosis: A Validation Study. *Neuroepidemiology* 2013;40:85-92.
155. Marrie RA, Yu BN, Leung S, et al. Prevalence and incidence of ischemic heart disease in multiple sclerosis: A population-based validation study. *Multiple Sclerosis and Related Disorders* 2013;2:355-361.
156. Marrie RA, Fisk JD, Yu BN, et al. Mental comorbidity and multiple sclerosis: validating administrative data to support population-based surveillance. *BMC Neurol* 2013;13:16.
157. Marrosu MG, Cocco E, Lai M, Spinicci G, Pischedda MP, Contu P. Patients with multiple sclerosis and risk of type 1 diabetes mellitus in Sardinia, Italy: a cohort study. *Lancet* 2002;359:1461-1465.
158. Marrosu MG, Sardu C, Cocco E, et al. Bias in parental transmission of the HLA-DR3 allele in Sardinian multiple sclerosis. *Neurology* 2004;63:1084-1086.
159. Martinez-Lapiscina EH, Ayuso T, Lacruz F, et al. Cortico-juxtacortical involvement increases risk of epileptic seizures in multiple sclerosis. *Acta Neurol Scand* 2013;128:24-31.
160. Mattioli F, Bellomi F, Stampatori C, Parrinello G, Capra R. Depression, disability and cognitive impairment in multiple sclerosis: a cross sectional Italian study. *Neurol Sci* 2011;32:825-832.
161. McGuigan C, Hutchinson M. Unrecognised symptoms of depression in a community-based population with multiple sclerosis. *Journal of Neurology* 2006;253:219-223.
162. Merlino G, Fratticci L, Lenchig C, et al. Prevalence of 'poor sleep' among patients with multiple sclerosis: an independent predictor of mental and physical status. *Sleep Med* 2009;10:26-34.
163. Metz LM, Seland P, Fritzler M. An analysis of the frequency of Sjogren's syndrome in a population of multiple sclerosis patients. *J Clin Lab Immunol* 1989;30:121-125.
164. Midgard R, Glatte E, Gronning M, Riise T, Edland A, Nyland H. Multiple sclerosis and cancer in Norway. A retrospective cohort study. *Acta Neurol Scand* 1996;93:411-415.
165. Midgard R, Gronning M, Riise T, Kvale G, Nyland H. Multiple sclerosis and chronic inflammatory diseases. A case-control study. *Acta neurologica scandinavica* 1996;93:322-328.
166. Miri S, Rohani M, Sahraian MA, et al. Restless legs syndrome in Iranian patients with multiple sclerosis. *Neurol Sci* 2013;34:1105-1108.
167. Miró J, Peña-Sagredo JL, Berciano J, Insúa S, Leno C, Velarde R. Prevalence of primary Sjögren's syndrome in patients with multiple sclerosis. *Ann Neurol* 1990;27:582-584.

168. Mohr DC, Hart SL, Julian L, Tasch ES. Screening for depression among patients with multiple sclerosis: two questions may be enough. *Multiple Sclerosis* 2007;13:215-219.
169. Moller H, Kneller RW, Boice JD, Jr., Olsen JH. Cancer incidence following hospitalization for multiple sclerosis in Denmark. *Acta Neurol Scand* 1991;84:214-220.
170. Montel SR, Bungener C. Coping and quality of life in one hundred and thirty five subjects with multiple sclerosis. *Mult Scler* 2007;13:393-401.
171. Monzani F, Caraccio N, Meucci G, et al. Effect of 1-year treatment with interferon-beta1b on thyroid function and autoimmunity in patients with multiple sclerosis. *Eur J Endocrinol* 1999;141:325-331.
172. Moreau T, Sochurkova D, Lemesle M, et al. Epilepsy in patients with multiple sclerosis: radiological-clinical correlations. *Epilepsia* 1998;39:893-896.
173. Moreau T, Schmidt N, Joyeux O, Bungener C, Souvignet V. Coping strategy and anxiety evolution in multiple sclerosis patients initiating interferon-beta treatment. *Eur Neurol* 2009;62:79-85.
174. Moreira NC, Damasceno RS, Medeiros CA, et al. Restless leg syndrome, sleep quality and fatigue in multiple sclerosis patients. *Braz J Med Biol Res* 2008;41:932-937.
175. Munteis E, Cano JF, Flores JA, Martinez-Rodriguez JE, Miret M, Roquer J. Prevalence of autoimmune thyroid disorders in a Spanish multiple sclerosis cohort. *European Journal of Neurology* 2007;14:1048-1052.
176. Nicholl CR, Lincoln NB, Francis VM, Stephan TF. Assessment of emotional problems in people with multiple sclerosis. *Clin Rehabil* 2001;15:657-668.
177. Nicoletti A, Sofia V, Biondi R, et al. Epilepsy and multiple sclerosis in Sicily: a population-based study. *Epilepsia* 2003;44:1445-1448.
178. Niederwieser G, Buchinger W, Bonelli RM, et al. Prevalence of autoimmune thyroiditis and non-immune thyroid disease in multiple sclerosis. *Journal of Neurology* 2003;250:672-675.
179. Nielsen NM, Rostgaard K, Rasmussen S, et al. Cancer risk among patients with multiple sclerosis: a population-based register study. *International Journal of Cancer* 2006;118:979-984.
180. Nielsen N, Frisch M, Rostgaard K, et al. Autoimmune diseases in patients with multiple sclerosis and their first-degree relatives: a nationwide cohort study in Denmark. *Multiple Sclerosis* 2008;14:823-829.
181. Noseworthy JH, Bass BH, Vandervoort MK, et al. The prevalence of primary Sjögren's syndrome in a multiple sclerosis population. *Ann Neurol* 1989;25:95-98.
182. Noy S, Achiron A, Gabbay U, et al. A new approach to affective symptoms in relapsing-remitting multiple sclerosis. *Compr Psychiatry* 1995;36:390-395.

183. Nuyen J, Schellevis FG, Satariano WA, et al. Comorbidity was associated with neurologic and psychiatric diseases: A general practice-based controlled study. *J Clin Epidemiol* 2006;59:1274–1284.
184. Nyquist PA, Cascino GD, Rodriguez M. Seizures in patients with multiple sclerosis seen at Mayo Clinic, Rochester, Minn, 1990-1998. *Mayo Clin Proc* 2001;76:983-986.
185. Olafsson E, Benedikz J, Hauser WA. Risk of epilepsy in patients with multiple sclerosis: a population-based study in Iceland. *Epilepsia* 1999;40:745-747.
186. Palo J, Duchesne J, Wikstrom J. Malignant diseases among patients with multiple sclerosis. *Journal of Neurology* 1977;216:217-222.
187. Pandya R, Metz L, Patten SB. Predictive value of the CES-D in detecting depression among candidates for disease-modifying multiple sclerosis treatment. *Psychosomatics* 2005;46:131-134.
188. Patten SB, Metz LM, Reimer MA. Biopsychosocial correlates of lifetime major depression in a multiple sclerosis population. *Multiple Sclerosis* 2000;6:115-120.
189. Zabad RK, Patten SB, Metz LM. The association of depression with disease course in multiple sclerosis. *Neurology* 2005;64:359-360.
190. Patten SB, Beck CA, Williams JVA, Barbui C, Metz LM. Major depression in multiple sclerosis. *Neurology* 2003;61:1524-1527.
191. Patten SB, Svenson LW, Metz LM. Descriptive epidemiology of affective disorders in multiple sclerosis. *CNS Spectr* 2005;10:365-371.
192. Patten SB, Svenson LW, Metz LM. Psychotic disorders in MS: Population-based evidence of an association. *Neurology* 2005;65:1123-1125.
193. Patten SB, Berzins S, Metz LM. Challenges in screening for depression in multiple sclerosis. *Multiple Sclerosis Journal* 2010;16:1406-1411.
194. Patti F, Cacopardo M, Palermo F, et al. Health-related quality of life and depression in an Italian sample of multiple sclerosis patients. *J Neurol Sci* 2003;211:55-62.
195. Patti F, Pozzilli C, Montanari E, et al. Effects of education level and employment status on HRQoL in early relapsing-remitting multiple sclerosis. *Mult Scler* 2007;13:783-791.
196. Paz Soldan MM, Pittock SJ, Weigand SD, Yawn BP, Rodriguez M. Statin therapy and multiple sclerosis disability in a population-based cohort. *Mult Scler* 2012;18:358-363.
197. Pedotti R, Farinotti M, Falcone C, et al. Allergy and multiple sclerosis: a population-based case-control study. *Multiple Sclerosis* 2009;15:899-906.

198. Percy AK, Noberga FT, Okazaki H, Glattre E, Kurland LT. Multiple sclerosis in Rochester, Minn. A 60-year appraisal. *Archives of Neurology* 1971;25:105-111.
199. Pittion-Vouyovitch S, Debouverie M, Guillemin F, Vandenberghe N, Anxionnat R, Vespignani H. Fatigue in multiple sclerosis is related to disability, depression and quality of life. *J Neurol Sci* 2006;243:39-45.
200. Pitzalis M, Zavattari P, Murru R, et al. Genetic loci linked to type 1 diabetes and multiple sclerosis families in Sardinia. *BMC Med Genet* 2008;9:3.
201. Poder K, Ghatavi K, Fisk J, et al. Social anxiety in a multiple sclerosis clinic population. *Multiple Sclerosis* 2009;15:393-398.
202. Poirier G, Montplaisir J, Dumont M, et al. Clinical and sleep laboratory study of narcoleptic symptoms in multiple sclerosis. *Neurology* 1987;37:693-695.
203. Ponsonby A-L, Dwyer T, Van Der Mei I, et al. Asthma onset prior to multiple sclerosis and the contribution of sibling exposure in early life. *Clinical & Experimental Immunology* 2006;146:463-470.
204. Porcel J, Rio J, Sanchez-Betancourt A, et al. Long-term emotional state of multiple sclerosis patients treated with interferon beta. *Mult Scler* 2006;12:802-807.
205. Ramagopalan SV, Dymont DA, Valdar W, et al. The occurrence of autoimmune disease in Canadian families with multiple sclerosis. *Lancet Neurology* 2007;6:604-610.
206. Rodrigo L, Hernandez-Lahoz C, Fuentes D, Alvarez N, Lopez-Vazquez A, Gonzalez S. Prevalence of celiac disease in multiple sclerosis. *BMC Neurol* 2011;11:31.
207. Romberg A, Ruutiainen J, Puukka P, Poikkeus L. Fatigue in multiple sclerosis patients during inpatient rehabilitation. *Disabil Rehabil* 2008;30:1480-1485.
208. Sadovnick A, Paty D, Yannakoulis G. Concurrence of multiple sclerosis and inflammatory bowel disease. *New England Journal of Medicine* 1989;321:762-763.
209. Sahraian MA, Jafarian S, Sheikhabaei S, Safavi F. Respiratory tract rather than cutaneous atopic allergy inversely associate with multiple sclerosis: a case-control study. *Clin Neurol Neurosurg* 2013;115:2099-2102.
210. Salter AR, Tyry T, Vollmer T, Cutter GR, Marrie RA. "Seeing" in NARCOMS: a look at vision-related quality of life in the NARCOMS registry. *Multiple Sclerosis Journal* 2013;19:953-960.
211. Salvatore S, Finazzi S, Ghezzi A, et al. Multiple sclerosis and celiac disease: is there an increased risk? *Multiple Sclerosis* 2004;10:711-712.
212. Sandberg-Wollheim M, Axell T, Hansen BU, et al. Primary Sjogren's syndrome in patients with multiple sclerosis. *Neurology* 1992;42:845-847.
213. Scott TF, Allen D, Price TR, McConnell H, Lang D. Characterization of major depression symptoms in multiple sclerosis patients. *J Neuropsychiatry Clin Neurosci* 1996;8:318-323.

214. Seyed Saadat SM, Hosseinezhad M, Bakhshayesh B, Seyed Saadat SN, Nabizadeh SP. Prevalence and predictors of depression in Iranian patients with multiple sclerosis: a population-based study. *Neurol Sci* 2013.
215. Seyfert S, Klapps P, Meisel C, Fischer T, Junghan U. Multiple sclerosis and other immunologic diseases. *Acta neurologica scandinavica* 1990;81:37-42.
216. Shaygannejad V, Ardestani PE, Ghasemi M, Meamar R. Restless legs syndrome in Iranian multiple sclerosis patients: a case-control study. *Int J Prev Med* 2013;4:S189-193.
217. Sheu JJ, Lin HC. Association between multiple sclerosis and chronic periodontitis: a population-based pilot study. *Eur J Neurol* 2013;20:1053-1059.
218. Shiraishi K, Higuchi Y, Ozawa K, Hao Q, Saida T. Clinical course and prognosis of 27 patients with childhood onset multiple sclerosis in Japan. *Brain Dev* 2005;27:224-227.
219. Simioni S, Ruffieux C, Bruggimann L, Annoni JM, Schluep M. Cognition, mood and fatigue in patients in the early stage of multiple sclerosis. *Swiss Med Wkly* 2007;137:496-501.
220. Sloka JS, Pryse-Phillips WEM, Stefanelli M, Joyce C. Co-occurrence of autoimmune thyroid disease in a multiple sclerosis cohort. *Journal of Autoimmune Diseases* 2005;2:9.
221. Smith SJ, Young CA. The role of affect on the perception of disability in multiple sclerosis. *Clin Rehabil* 2000;14:50-54.
222. Soderberg KC, Jonsson F, Winqvist O, Hagmar L, Feychting M. Autoimmune diseases, asthma and risk of haematological malignancies: a nationwide case-control study in Sweden. *Eur J Cancer* 2006;42:3028-3033.
223. Sokic DV, Stojisavljevic N, Drulovic J, et al. Seizures in multiple sclerosis. *Epilepsia* 2001;42:72-79.
224. Sollom AC, Kneebone II. Treatment of depression in people who have multiple sclerosis. *Multiple Sclerosis* 2007;13:632-635.
225. Solomon AJ, Hills W, Chen Z, Rosenbaum J, Bourdette D, Whitham R. Autoantibodies and Sjogren's Syndrome in multiple sclerosis, a reappraisal. *PLoS One* 2013;8:e65385.
226. Somer H, Muller K, Kinnunen E. Myasthenia gravis associated with multiple sclerosis. Epidemiological survey and immunological findings. *J Neurol Sci* 1989;89:37-48.
227. Spain LA, Tubridy N, Kilpatrick TJ, Adams SJ, Holmes AC. Illness perception and health-related quality of life in multiple sclerosis. *Acta Neurol Scand* 2007;116:293-299.
228. Striano P, Orefice G, Brescia Morra V, et al. Epileptic seizures in multiple sclerosis: clinical and EEG correlations. *Neurol Sci* 2003;24:322-328.
229. Sumelahti M-L, Pukkala E, Hakama M. Cancer incidence in multiple sclerosis: a 35-year follow-up. *Neuroepidemiology* 2004;23:224-227.
230. Sun LM, Lin CL, Chung CJ, Liang JA, Sung FC, Kao CH. Increased breast cancer risk for patients with multiple sclerosis: a nationwide population-based cohort study. *Eur J Neurol* 2013.

231. Sundgren M, Maurex L, Wahlin A, Piehl F, Brismar T. Cognitive impairment has a strong relation to nonsomatic symptoms of depression in relapsing-remitting multiple sclerosis. *Arch Clin Neuropsychol* 2013;28:144-155.
232. Sunesen KG, Norgaard M, Thorlacius-Ussing O, Laurberg S. Immunosuppressive disorders and risk of anal squamous cell carcinoma: a nationwide cohort study in Denmark, 1978-2005. *Int J Cancer* 2010;127:675-684.
233. Tachibana N, Howard RS, Hirsch NP, Miller DH, Moseley IF, Fish D. Sleep problems in multiple sclerosis. *European Neurology* 1994;34:320-323.
234. Tanriverdi D, Okanli A, Sezgin S, Ekinici M. Quality of life in patients with multiple sclerosis in Turkey: relationship to depression and fatigue. *J Neurosci Nurs* 2010;42:267-273.
235. Tarrants M, Oleen-Burkey M, Castelli-Haley J, Lage MJ. The impact of comorbid depression on adherence to therapy for multiple sclerosis. *Mult Scler Int* 2011;2011:271321.
236. Tourbah A, Clapin A, Gout O, et al. Systemic autoimmune features and multiple sclerosis: a 5-year follow-up study. *Archives of Neurology* 1998;55:517-521.
237. Tremlett HL, Evans J, Wiles CM, Luscombe DK. Asthma and multiple sclerosis: an inverse association in a case-control general practice population. *Quarterly Journal of Medicine* 2002;95:753-756.
238. Trouillas P, Courjon J. Epilepsy with multiple sclerosis. *Epilepsia* 1972;13:325-333.
239. Turner AP, Hawkins EJ, Haselkorn JK, Kivlahan DR. Alcohol misuse and multiple sclerosis. *Arch Phys Med Rehabil* 2009;90:842-848.
240. Turpin KV, Carroll LJ, Cassidy JD, Hader WJ. Deterioration in the health-related quality of life of persons with multiple sclerosis: the possible warning signs. *Multiple Sclerosis* 2007;13:1038-1045.
241. Uribe-San-Martin R, Ciampi-Diaz E, Suarez-Hernandez F, Vasquez-Torres M, Godoy-Fernandez J, Carcamo-Rodriguez C. Prevalence of epilepsy in a cohort of patients with multiple sclerosis. *Seizure* 2014;23:81-83.
242. Valleroy ML, Kraft GH. Sexual dysfunction in multiple sclerosis. *Arch Phys Med Rehabil* 1984;65:125-128.
243. Viveiros CD, Alvarenga RMP. Prevalence of epilepsy in a case series of multiple sclerosis patients. *Arquivos de Neuro-Psiquiatria* 2010;68:731-736.
244. Vogt A, Kappos L, Calabrese P, et al. Working memory training in patients with multiple sclerosis - comparison of two different training schedules. *Restor Neurol Neurosci* 2009;27:225-235.
245. Warren SA, Turpin KV, Pohar SL, Jones CA, Warren KG. Comorbidity and health-related quality of life in people with multiple sclerosis. *International Journal of MS Care* 2009;11:6-16.
246. Wertman E, Zilber N, Abramsky O. An association between multiple sclerosis and type I diabetes mellitus. *J Neurol* 1992;239:43-45.

247. Williams RM, Turner AP, Hatzakis M, Jr., Bowen JD, Rodriguez AA, Haselkorn JK. Prevalence and correlates of depression among veterans with multiple sclerosis. *Neurology* 2005;64:75-80.
248. Wood B, van der Mei I, Ponsonby A-L, et al. Prevalence and concurrence of anxiety, depression and fatigue over time in multiple sclerosis. *Multiple Sclerosis Journal* 2013;19:217-224.
249. Wynn DR, Rodriguez M, O'Fallon WM, Kurland LT. A reappraisal of the epidemiology of multiple sclerosis in Olmsted County, Minnesota. *Neurology* 1990;40:780-786.
250. Zettl UK, Bauer-Steinhusen U, Glaser T, Hechenbichler K, Limmroth V. Evaluation of an electronic diary for improvement of adherence to interferon beta-1b in patients with multiple sclerosis: design and baseline results of an observational cohort study. *BMC Neurol* 2013;13:117.
251. Zorzon M, de Masi R, Nasuelli D, et al. Depression and anxiety in multiple sclerosis. A clinical and MRI study in 95 subjects. *Journal of Neurology* 2001;248:416-421.
252. Zorzon M, Zivadinov R, Nasuelli D, et al. Risk factors of multiple sclerosis: a case-control study. *Neurological Sciences* 2003;24:242-247.
