# Supplementary material for: A systematic review of the incidence and prevalence of comorbidity in multiple sclerosis: Overview
Source: PubMed Central journal article supplement — Mult Scler. 2015 Mar;21(3):263–81. doi: 10.1177/1352458514564491 (PMC4361468; doi:10.1177/1352458514564491), 2015-03
Supplement: Supplemental_Table_2.pdf [file Supplemental_Table_2.pdf]

**Supplemental Table 2. Quality assessment scores of all co-morbidities incidence and prevalence studies**

| Study (Year)      | Q1: Target population described? | Q2: Cases from entire population or probability sampling? | Q3: Response rate >70%? | Q4: Non-responders clearly described? | Q5: Sample representative of population? | Q6: Data collection methods standardized? | Q7A: Validated criteria or approach to assess MS? | Q7B: Validated criteria or approach to assess disease? | Q8: Were estimates given with confidence intervals? | Total Score | Q9: Are standardized estimated reported? |
|-------------------|----------------------------------|-----------------------------------------------------------|-------------------------|---------------------------------------|------------------------------------------|-------------------------------------------|---------------------------------------------------|--------------------------------------------------------|-----------------------------------------------------|-------------|------------------------------------------|
| Achiron (2005)    | no                               | no                                                        | yes                     | NA                                    | yes                                      | yes                                       | yes                                               | yes                                                    | no                                                  | 5/8         | no                                       |
| Allen (2008)      | yes                              | no                                                        | yes                     | NA                                    | yes                                      | yes                                       | no                                                | no                                                     | no                                                  | 4/8         | no                                       |
| Allen (2013)      | yes                              | yes                                                       | yes                     | NA                                    | NR                                       | yes                                       | no                                                | no                                                     | no                                                  | 4/8         | no                                       |
| Alschuler (2012)  | yes                              | no                                                        | no                      | yes                                   | NR                                       | yes                                       | no                                                | yes                                                    | no                                                  | 4/9         | no                                       |
| Amato (2001)      | yes                              | no                                                        | NR                      | no                                    | no                                       | yes                                       | yes                                               | yes                                                    | no                                                  | 4/9         | no                                       |
| Annunziata (2011) | yes                              | no                                                        | NR                      | no                                    | NR                                       | yes                                       | yes                                               | yes                                                    | no                                                  | 4/9         | no                                       |
| Auger (2005)      | yes                              | no                                                        | NR                      | no                                    | NR                                       | yes                                       | no                                                | yes                                                    | no                                                  | 3/9         | no                                       |
| Avasarala (2003)  | no                               | no                                                        | NR                      | no                                    | NR                                       | yes                                       | NR                                                | yes                                                    | no                                                  | 2/9         | no                                       |
| Bahmanyar (2009)  | yes                              | yes                                                       | yes                     | NA                                    | yes                                      | yes                                       | yes                                               | yes                                                    | no                                                  | 7/8         | no                                       |
| Baker (1972)      | no                               | no                                                        | yes                     | NA                                    | NR                                       | NR                                        | no                                                | no                                                     | no                                                  | 1/8         | no                                       |
| Bamer (2008)      | yes                              | no                                                        | no                      | no                                    | no                                       | yes                                       | no                                                | yes                                                    | no                                                  | 3/9         | no                                       |
| Barcellos (2006)  | yes                              | no                                                        | yes                     | no                                    | NR                                       | yes                                       | yes                                               | no                                                     | no                                                  | 4/9         | no                                       |

|                                  |     |     |     |     |     |     |     |     |     |     |     |
|----------------------------------|-----|-----|-----|-----|-----|-----|-----|-----|-----|-----|-----|
| Basiri (2009)                    | no  | no  | yes | NA  | NR  | NR  | yes | yes | no  | 3/8 | no  |
| Baumstarek-Barrau (2011)         | yes | no  | NR  | no  | no  | yes | yes | yes | no  | 4/9 | no  |
| Bazelier (2012)                  | yes | yes | yes | NA  | NR  | yes | yes | yes | yes | 8/8 | yes |
| Beiske (2008)                    | yes | yes | no  | yes | yes | yes | yes | yes | yes | 8/9 | no  |
| Bergamaschi (2009)               | yes | no  | yes | NA  | NR  | yes | yes | yes | no  | 5/8 | no  |
| Bloomgren (2012)                 | yes | no  | yes | NA  | NR  | yes | no  | no  | no  | 3/8 | no  |
| Bodini (2008)                    | yes | no  | NR  | no  | no  | yes | yes | yes | no  | 4/8 | no  |
| Bombardier* (alcohol) (2004)     | yes | no  | no  | no  | no  | yes | no  | yes | no  | 4/9 | no  |
| Bombardier* (drug misuse) (2004) | yes | no  | no  | no  | no  | yes | no  | yes | no  | 4/9 | no  |
| Borhani Haghghi (2007)           | yes | no  | NR  | no  | yes | yes | yes | yes | no  | 5/9 | no  |
| Brajkovic (2009)                 | no  | no  | no  | no  | yes | yes | yes | yes | no  | 4/9 | no  |
| Braley (2012)                    | yes | no  | yes | NA  | yes | yes | NR  | yes | no  | 5/9 | no  |
| Brichetto (2003)                 | yes | yes | no  | yes | yes | yes | yes | no  | no  | 6/9 | no  |
| Brown (2009)                     | yes | no  | yes | no  | NR  | yes | yes | yes | no  | 5/9 | no  |

|                     |     |     |     |    |     |     |                  |     |     |     |    |
|---------------------|-----|-----|-----|----|-----|-----|------------------|-----|-----|-----|----|
| Buchanan (2003)     | yes | no  | yes | NA | yes | yes | no               | yes | no  | 5/8 | no |
| Buchanan (2006)     | yes | no  | no  | no | no  | yes | no               | no  | no  | 2/9 | no |
| Buchanan (2011)     | yes | no  | no  | no | yes | yes | no               | no  | yes | 4/9 | no |
| Burns (2013)        | yes | no  | NR  | no | yes | yes | yes              | yes | no  | 5/9 | no |
| Carta (2014)        | yes | no  | NR  | no | yes | yes | yes              | yes | no  | 5/9 | no |
| Catenoix (2011)     | yes | no  | yes | NA | yes | yes | yes              | no  | no  | 5/8 | no |
| Cendrowski (1972)   | yes | no  | NR  | NR | NR  | no  | no               | no  | no  | 1/9 | no |
| Cendrowski (1989)   | no  | no  | NR  | no | NR  | NR  | no               | no  | no  | 0/9 | no |
| Cetin (2007)        | yes | no  | no  | no | no  | yes | no               | yes | no  | 3/9 | no |
| Cheng (2012)        | yes | no  | yes | NA | NR  | yes | yes              | yes | no  | 5/8 | no |
| Christiansen (2010) | yes | yes | yes | NA | yes | yes | yes <sup>a</sup> | no  | no  | 6/8 | no |
| Chwastiak (2002)    | yes | no  | no  | no | no  | yes | no               | yes | no  | 3/9 | no |
| da Silva (2011)     | yes | no  | yes | NA | NR  | yes | yes              | yes | no  | 5/8 | no |
| Dahl (2009)         | yes | yes | yes | no | yes | yes | yes              | yes | no  | 7/9 | no |

|                   |     |     |     |     |     |     |     |     |    |     |    |
|-------------------|-----|-----|-----|-----|-----|-----|-----|-----|----|-----|----|
| Dallmeijer (2009) | yes | no  | NR  | no  | NR  | yes | no  | no  | no | 2/9 | no |
| De Keyser (1988)  | no  | no  | yes | NA  | yes | NR  | yes | no  | no | 3/8 | no |
| de Seze (2005)    | no  | no  | yes | NA  | NR  | yes | no  | yes | no | 3/8 | no |
| de Seze (2001)    | yes | no  | NR  | no  | yes | yes | yes | yes | no | 5/9 | no |
| Demakis (2009)    | yes | yes | yes | NA  | yes | yes | no  | yes | no | 6/8 | no |
| Deretzi (2010)    | yes | no  | yes | yes | yes | yes | yes | no  | no | 6/9 | no |
| Deriu (2009)      | yes | no  | NR  | no  | yes | yes | yes | yes | no | 5/9 | no |
| Dias (2012)       | yes | no  | NR  | no  | no  | yes | no  | no  | no | 2/9 | no |
| Drake (1961)      | no  | NR  | NR  | NA  | NR  | no  | no  | no  | no | 0/9 | no |
| Durelli (2001)    | yes | no  | NR  | no  | no  | yes | yes | yes | no | 4/9 | no |
| Durmus (2013)     | yes | no  | yes | NA  | NR  | yes | yes | yes | no | 5/8 | no |
| Eaton (2007)      | no  | yes | yes | NA  | yes | yes | no  | no  | no | 4/8 | no |
| Eaton (2010)      | no  | yes | yes | NA  | yes | yes | no  | no  | no | 4/8 | no |
| Edwards (2004)    | no  | no  | yes | NA  | yes | NR  | NR  | NR  | no | 2/8 | no |

|                                     |     |     |     |    |     |     |     |     |    |     |    |
|-------------------------------------|-----|-----|-----|----|-----|-----|-----|-----|----|-----|----|
| Einarsson (2003)                    | yes | no  | NR  | no | no  | yes | NR  | yes | no | 3/9 | no |
| Engelsen (1997)                     | yes | yes | yes | NA | yes | yes | yes | yes | no | 7/8 | no |
| Eriksson (2002)                     | yes | yes | yes | NA | yes | yes | yes | yes | no | 7/8 | no |
| Espinola-Nadurille (2010)           | yes | no  | NR  | NA | NR  | yes |     | yes | no | 4/8 | no |
| Etemadifar (2012)                   | yes | yes | yes | NA | yes | yes | yes | yes | no | 7/8 | no |
| Etemadifar (2013)                   | yes | yes | yes | NA | yes | yes | yes | yes | no | 7/8 | no |
| Fanouriakis (2013)                  | no  | yes | yes | NA | yes | yes | yes | yes | no | 6/8 | no |
| Feinstein (2002)                    | yes | no  | NR  | no | yes | yes | yes | yes | no | 5/9 | no |
| Feinstein (2002)<br>Korostil (2007) | yes | no  | NR  | no | yes | yes |     | yes | no | 5/9 | no |
| Ferini-Strambi (1994)               | yes | no  | NR  | no | no  | yes | yes | yes | no | 4/9 | no |
| Ferrando (2007)                     | yes | no  | NR  | no | NR  | yes | NR  | yes | no | 3/9 | no |
| Finlayson (2013)                    | yes | no  | NR  | no | NR  | yes | no  | no  | no | 2/9 | no |
| Fisk (1998)                         | no  | no  | yes | NA | yes | yes | yes | yes | no | 5/8 | no |
| Fleming (1994)                      | yes | no  | yes | NA | yes | yes | no  | no  | no | 4/8 | no |
| Forbes (2006)                       | yes | no  | no  | no | no  | yes | NR  | no  | no | 2/9 | no |

|                     |     |     |     |    |     |     |     |     |    |     |    |
|---------------------|-----|-----|-----|----|-----|-----|-----|-----|----|-----|----|
| Foroughipour (2012) | yes | no  | NR  | no | no  | yes | yes | yes | no | 4/9 | no |
| Fragoso (2011)      | yes | no  | NR  | no | yes | yes | yes | yes | no | 5/9 | no |
| Fromont (2013)      | yes | yes | yes | NA | yes | yes | yes | yes | no | 7/8 | no |
| Fuvesi (2010)       | yes | yes | NR  | no | NR  | yes | yes | no  | no | 4/9 | no |
| Galeazzi (2005)     | yes | no  | yes | no | no  | yes | yes | yes | no | 6/9 | no |
| Gambardella (2003)  | yes | no  | yes | NA | NR  | yes | yes | yes | no | 5/8 | no |
| Garfield (2012)     | yes | no  | no  | no | no  | yes | NR  | yes | no | 3/9 | no |
| Ghadirian (2001)    | yes | no  | yes | no | NR  | yes | no  | no  | no | 3/9 | no |
| Ghajarzadeh (2012)  | yes | no  | NR  | no | NR  | yes | yes | yes | no | 4/9 | no |
| Ghezzi (1990)       | yes | no  | yes | NA | yes | yes | yes | yes | no | 6/8 | no |
| Goldacre (2004)     | yes | yes | yes | NA | yes | yes | no  | no  | no | 5/8 | no |
| Gomez-Choco (2007)  | yes | no  | NR  | no | yes | yes | yes | yes | no | 5/9 | no |
| Gold (2003)         | no  | no  | no  | no | no  | yes | yes | yes | no | 3/9 | no |
| Goodin (1999)       | yes | no  | no  | no | yes | yes | no  | no  | no | 3/9 | no |

|                  |     |     |     |     |         |     |     |     |    |     |    |
|------------------|-----|-----|-----|-----|---------|-----|-----|-----|----|-----|----|
| Goretti (2009)   | yes | no  | NR  | no  | no      | yes | yes | yes | no | 4/9 | no |
| Goretti (2010)   | yes | no  | yes | NA  | yes     | yes | yes | yes | no | 6/8 | no |
| Gottberg (2007)  | yes | yes | yes | no  | yes     | yes | yes | yes | no | 7/9 | no |
| Hakim (2007)     | yes | yes | yes | yes | yes     | yes | yes | yes | no | 7/9 | no |
| Hanrahan (1988)  | no  | NR  | NR  | NA  | NR      | yes | NR  | yes | no | 2/8 | no |
| Harel (2007)     | yes | no  | yes | no  | yes     | yes | yes | yes | no | 6/9 | no |
| Hemminki (2011)  | no  | yes | yes | NA  | yes     | yes | no  | yes | no | 5/8 | no |
| Hemminki (2012)  | no  | yes | yes | NA  | yes     | yes | no  | yes | no | 5/8 | no |
| Hemminki (2012)  | no  | yes | yes | NA  | yes     | yes | no  | yes | no | 5/8 | no |
| Hemminki (2012)  | no  | yes | yes | NA  | yes     | yes | no  | yes | no | 5/8 | no |
| Hemminki (2012)  | no  | yes | yes | NA  | yes     | yes | no  | yes | no | 5/8 | no |
| Hemminki (2013)  | no  | yes | yes | NA  | yes     | yes | no  | yes | no | 5/8 | no |
| Hemminki (2013)  | no  | yes | yes | NA  | yes     | yes | no  | yes | no | 5/8 | no |
| Henderson (2000) | no  | yes | yes | yes | unclear | yes | no  | no  | no | 4/9 | no |

|                       |     |     |     |     |     |     |     |     |    |     |    |
|-----------------------|-----|-----|-----|-----|-----|-----|-----|-----|----|-----|----|
| Hjalgrim (2004)       | yes | yes | yes | NA  | yes | yes | yes | yes | no | 7/8 | no |
| Holper (2010)         | yes | yes | yes | no  | yes | yes | yes | no  | no | 6/9 | no |
| Hopman (2007)         | yes | yes | yes | yes | yes | yes | NR  | no  | no | 6/9 | no |
| Hoppenbrouwers (2007) | yes | no | 8/9 | no |
| Horton (2010)         | yes | no  | NR  | NA  | yes | yes | yes | yes | no | 5/8 | no |
| Hussein (2006)        | no  | NR  | NR  | NA  | NR  | yes | NR  | NR  | no | 1/8 | no |
| Isaksson (2007)       | yes | no  | NR  | no  | no  | yes | yes | yes | no | 4/9 | no |
| Jadidi (2013)         | yes | yes | yes | NA  | yes | yes | no  | no  | no | 5/8 | no |
| Janardhan (2002)      | yes | no  | yes | no  | no  | yes | yes | yes | no | 4/9 | no |
| Janssens (2003)       | yes | no  | yes | yes | yes | yes | yes | yes | no | 7/9 | no |
| Janssens (2006)       | yes | no  | no  | yes | no  | yes | yes | yes | no | 5/9 | no |
| Joffe (1987)          | no  | no  | NR  | no  | no  | yes | NR  | yes | no | 3/9 | no |
| Johansson (2007)      | yes | no  | yes | no  | NR  | yes | yes | yes | no | 5/9 | no |
| Jonsson (1996)        | yes | no  | no  | yes | no  | yes | yes | yes | no | 5/9 | no |



|                     |     |     |     |    |     |     |     |     |    |     |     |
|---------------------|-----|-----|-----|----|-----|-----|-----|-----|----|-----|-----|
| Julian (2009)       | yes | no  | no  | no | no  | yes | NR  | yes | no | 3/9 | no  |
| Kaminska (2012)     | yes | no  | no  | no | no  | yes | yes | yes | no | 4/9 | no  |
| Kang (2010)         | no  | yes | yes | NA | yes | yes | no  | no  | no | 4/8 | no  |
| Kanjwal (2010)      | yes | no  | NA  | NA | NR  | yes | no  | yes | no | 3/8 | no  |
| Karara (2013)       | yes | no  | NR  | no | NR  | yes | yes | no  | no | 3/9 | no  |
| Karimi (2013)       | yes | no  | NR  | NA | NR  | yes | yes | NR  | no | 3/8 | No  |
| Kargarfard (2012)   | yes | no  | yes | no | no  | yes | NR  | yes | no | 4/9 | no  |
| Karni (1999)        | yes | no  | NR  | no | yes | yes | yes | yes | no | 5/9 | no  |
| Kehler (2009)       | yes | no  | NR  | no | yes | yes | NR  | yes | no | 4/9 | no  |
| Ketelslegers (2010) | yes | no  | NR  | no | no  | yes | yes | yes | no | 4/9 | no  |
| Kingwell (2012)     | yes | yes | yes | NA | yes | yes | yes | yes | no | 7/8 | no  |
| Kinnunen (1986)     | yes | yes | yes | NA | yes | yes | yes | yes | no | 8/8 | yes |
| Khan (2007)         | yes | no  | no  | no | no  | yes | yes | no  | no | 3/9 | no  |
| Klevan (2014)       | yes | yes | yes | NA | yes | yes | yes | yes | no | 8/9 | no  |

|                                 |     |     |     |    |     |     |     |     |     |     |    |
|---------------------------------|-----|-----|-----|----|-----|-----|-----|-----|-----|-----|----|
| Koshiol (2011)                  | yes | yes | yes | NA | yes | yes | NR  | NR  | no  | 5/8 | no |
| Krokki (2006)                   | yes | no  | yes | NA | yes | yes | yes | yes | no  | 6/8 | no |
| Landgren (2011)                 | yes | no  | yes | NA | NR  | yes | no  | no  | no  | 3/8 | no |
| Langer-Gould (2010)             | yes | no  | yes | NA | yes | yes | yes | yes | no  | 6/8 | no |
| Laroni (2006)                   | yes | no  | NR  | no | yes | yes | yes | yes | no  | 5/9 | no |
| LaVela (2012)                   | yes | no  | no  | no | yes | yes | yes | no  | no  | 4/8 | no |
| Lawrenson (2001)                | yes | yes | yes | NA | yes | yes | no  | no  | yes | 6/8 | no |
| Lebrun (2008)                   | yes | yes | yes | NA | yes | yes | yes | no  | no  | 6/8 | no |
| Lebrun (2011)                   | yes | yes | yes | NA | yes | yes | yes | no  | no  | 6/8 | no |
| Lehan (2012)                    | no  | no  | NR  | no | no  | yes | NR  | no  | no  | 1/9 | no |
| Levinthal (2013)                | yes | no  | NR  | no | yes | yes | NR  | yes | no  | 4/9 | no |
| Le Scanff (2008)                | no  | no  | yes | no | yes | yes | yes | yes | no  | 5/9 | no |
| Leonavicius <sup>o</sup> (2011) | yes | no  | NR  | NR | no  | yes | no  | yes | no  | 3/9 | no |
| Leonavicius <sup>o</sup> (2013) | yes | NR  | NR  | NR | NR  | yes | no  | yes | no  | 3/9 | no |

|                   |     |     |     |     |     |     |     |     |     |     |    |
|-------------------|-----|-----|-----|-----|-----|-----|-----|-----|-----|-----|----|
| Li (2012)         | yes | no  | yes | yes | NR  | yes | yes | yes | no  | 6/9 | no |
| Lindgard (1985)   | no  | yes | yes | NA  | yes | yes | no  | no  | no  | 4/8 | no |
| Liu (2012)        | no  | yes | yes | NA  | yes | yes | no  | yes | no  | 5/8 | no |
| Lobentanz (2004)  | yes | no  | no  | no  | no  | yes | no  | yes | no  | 3/9 | no |
| Lu (2013)         | yes | yes | yes | NA  | yes | yes | yes | no  | no  | 6/8 | no |
| Lutterotti (2011) | yes | no  | NR  | no  | no  | yes | yes | yes | no  | 4/9 | no |
| Manconi (2007)    | yes | no  | NR  | no  | yes | yes | yes | yes | no  | 5/9 | no |
| Manconi (2008)    | yes | no  | yes | no  | yes | yes | yes | yes | no  | 6/9 | no |
| Manconi (2008)    | yes | no  | yes | no  | yes | yes | yes | yes | yes | 7/9 | no |
| Maor (2001)       | yes | no  | NR  | no  | NR  | yes | no  | yes | no  | 3/9 | no |
| Marrie (2008)     | yes | no  | no  | yes | yes | yes | no  | yes | no  | 5/9 | no |
| Marrie (2009)     | yes | no  | no  | yes | yes | yes |     | yes | no  | 5/9 | no |
| Marrie (2009)     | yes | no  | no  | yes | yes | yes | no  | yes | no  | 5/9 | no |
| Marrie (2011)     | yes | no  | no  | yes | yes | yes | no  | yes | no  | 5/9 | no |

|                           |     |     |     |     |     |     |     |     |     |     |     |
|---------------------------|-----|-----|-----|-----|-----|-----|-----|-----|-----|-----|-----|
| Marrie (2012)             | yes | yes | yes | NA  | yes | yes | yes | yes | yes | 8/8 | yes |
| Marrie (2012)             | yes | yes | yes | NA  | yes | yes | yes | yes | yes | 8/8 | yes |
| Marrie (2013)             | yes | yes | yes | NA  | yes | yes | yes | yes | yes | 8/8 | yes |
| Marrie (2013)             | yes | yes | yes | NA  | yes | yes | yes | yes | yes | 8/8 | yes |
| Marrie (2013)             | yes | yes | yes | NA  | yes | yes | yes | yes | yes | 8/8 | yes |
| Marrosu (2002)            | no  | no  | NR  | no  | yes | yes | yes | yes | no  | 4/9 | no  |
| Marrosu (2004)            | no  | no  | yes | no  | yes | NR  | yes | no  | no  | 3/9 | no  |
| Martinez-Lapiscina (2013) | yes | no  | yes | NA  | NR  | yes | yes | yes | no  | 5/8 | no  |
| Mattioli (2011)           | yes | no  | NR  | no  | NR  | yes | yes | yes | no  | 4/9 | no  |
| McCrone (2008)            | yes | no  | no  | no  | no  | yes | no  | yes | no  | 3/9 | no  |
| McGuigan (2006)           | yes | yes | no  | yes | yes | yes | yes | yes | yes | 8/9 | no  |
| Merlino (2009)            | yes | yes | NR  | no  | NR  | yes | yes | yes | no  | 5/9 | no  |
| Metz (1989)               | yes | no  | NR  | no  | yes | yes | yes | yes | no  | 5/9 | no  |
| Midgard (Cancer) (1996)   | yes | yes | yes | NA  | yes | yes | yes | yes | no  | 7/8 | no  |

|                      |     |     |     |     |     |     |     |     |     |     |     |
|----------------------|-----|-----|-----|-----|-----|-----|-----|-----|-----|-----|-----|
| Midgard (AID) (1996) | yes | yes | yes | no  | yes | yes | yes | no  | no  | 6/9 | no  |
| Miri (2013)          | yes | no  | NR  | no  | yes | yes | yes | yes | no  | 5/9 | no  |
| Miro (1990)          | yes | no  | NR  | no  | no  | yes | yes | yes | no  | 4/9 | no  |
| Mohr (2007)          | yes | no  | no  | no  | no  | yes | no  | yes | no  | 4/9 | no  |
| Moller (1991)        | no  | yes | yes | NA  | yes | yes | yes | yes | no  | 6/8 | no  |
| Montel (2008)        | yes | no  | NR  | no  | yes | yes | yes | yes | no  | 5/9 | no  |
| Monzani (1999)       | no  | no  | NR  | no  | NR  | yes | yes | yes | no  | 3/9 | no  |
| Moreau (1998)        | yes | no  | NR  | no  | no  | yes | yes | yes | no  | 4/9 | no  |
| Moreau (2009)        | yes | no  | NR  | no  | yes | yes | yes | yes | no  | 6/9 | no  |
| Moreira (2008)       | yes | no  | yes | no  | yes | yes | NR  | yes | no  | 5/9 | no  |
| Munteis (2007)       | yes | no  | NR  | no  | NR  | yes | yes | yes | no  | 4/9 | no  |
| Nicholl (2001)       | yes | no  | yes | yes | yes | yes | no  | yes | no  | 6/9 | no  |
| Nicoletti (2003)     | yes | yes | yes | NA  | yes | yes | yes | yes | yes | 8/8 | yes |
| Niederweiser (2003)  | yes | no  | NR  | no  | yes | yes | yes | yes | no  | 5/9 | no  |



|                           |     |     |     |     |     |     |     |     |     |     |    |
|---------------------------|-----|-----|-----|-----|-----|-----|-----|-----|-----|-----|----|
| Patten (2010)             | yes | yes | NR  | no  | yes | yes | no  | yes | yes | 6/9 | no |
| Patten (2012)             | yes | yes | yes | no  | yes | yes | no  | no  | yes | 6/9 | no |
| Patti (2003)              | yes | yes | no  | yes | yes | yes | NR  | yes | no  | 6/9 | no |
| Patti (2007)              | yes | no  | yes | no  | no  | yes | yes | yes | no  | 5/9 | no |
| Paz Soldan (2013)         | yes | yes | yes | NA  | NR  | yes | yes | yes | no  | 6/8 | no |
| Pedotti (2009)            | yes | yes | yes | no  | NR  | yes | yes | yes | no  | 6/9 | No |
| Percy (1971)              | yes | yes | yes | NA  | yes | yes | yes | NR  | no  | 6/8 | no |
| Pittion-Vouyovitch (2006) | yes | no  | NR  | yes | yes | yes | yes | yes | no  | 7/9 | no |
| Pitzalis (2008)           | no  | no  | NA  | no  | NR  | yes | NR  | NR  | no  | 1/9 | no |
| Podar (2009)              | yes | yes | yes | no  | yes | yes | yes | yes | no  | 7/9 | no |
| Poirier (1987)            | no  | no  | no  | no  | no  | yes | yes | no  | no  | 2/9 | no |
| Ponsonby (2006)           | yes | yes | yes | no  | NR  | yes | yes | no  | no  | 5/9 | no |
| Porcel (2006)             | yes | no  | yes | no  | NR  | yes | NR  | yes | no  | 4/9 | no |
| Ramagopalan (2007)        | yes | no  | no  | no  | yes | yes | yes | yes | no  | 5/9 | no |

|                                |     |     |     |     |         |     |     |     |    |     |    |
|--------------------------------|-----|-----|-----|-----|---------|-----|-----|-----|----|-----|----|
| Rodrigo (2011)                 | yes | no  | yes | NR  | yes     | yes | NR  | yes | no | 5/9 | no |
| Romberg (2007)                 | yes | NR  | NR  | no  | no      | yes | yes | yes | no | 4/9 | no |
| Sadovnick (1989)               | no  | yes | NR  | NA  | NR      | yes | yes | yes | no | 4/8 | no |
| Sadovnick (1996)               | no  | no  | yes | no  | yes     | yes | yes | yes | no | 5/9 | no |
| Sahraian (2013)                | yes | no  | yes | no  | NR      | yes | yes | no  | no | 4/9 | No |
| Salter (2013)                  | yes | no  | no  | yes | yes     | yes | no  | yes | no | 5/9 | no |
| Salvatore (2004)               | no  | no  | NR  | no  | NR      | yes | NR  | NR  | no | 1/9 | no |
| Sandberg-Wollheim (1992)       | yes | no  | NR  | NA  | unclear | yes | yes | yes | no | 4/8 | no |
| Scott (1996)                   | yes | no  | yes | NA  | NR      | yes | yes | yes | no | 5/8 | no |
| Seyed Saadat (2013)            | yes | no  | yes | yes | NR      | yes | yes | yes | no | 6/9 | no |
| Seyfert (1990)                 | yes | no  | yes | NA  | yes     | yes | yes | no  | no | 5/8 | no |
| Shaygannejad (sleep) (2013)    | yes | no  | NR  | no  | yes     | yes | yes | yes | no | 5/9 | no |
| Shaygannejad (epilepsy) (2013) | yes | no  | yes | NA  | yes     | yes | yes | yes | no | 6/8 | no |
| Sheu (2013)                    | yes | yes | yes | NA  | yes     | yes | no  | no  | no | 5/8 | no |



|                  |     |     |     |    |     |     |     |     |    |     |    |
|------------------|-----|-----|-----|----|-----|-----|-----|-----|----|-----|----|
| Shiraishi (2005) | yes | no  | yes | NA | NR  | yes | yes | no  | no | 4/8 | no |
| Simioni (2007)   | yes | no  | NR  | no | yes | yes | yes | yes | no | 5/9 | no |
| Sloka (2005)     | yes | yes | yes | no | yes | yes | yes | yes | no | 7/9 | no |
| Smith (2000)     | yes | no  | NR  | no | no  | yes | no  | yes | no | 3/9 | no |
| Soderberg (2006) | no  | yes | NR  | NA | NR  | yes | no  | no  | no | 2/8 | no |
| Sokic (2001)     | yes | no  | yes | NA | yes | yes | yes | yes | no | 6/8 | no |
| Solomon (2013)   | yes | no  | NR  | NA | no  | yes | yes | yes | no | 4/8 | no |
| Sollom (2007)    | yes | no  | NR  | no | no  | yes | no  | yes | no | 3/9 | no |
| Somer (1989)     | no  | yes | yes | NA | yes | yes | yes | yes | no | 6/8 | no |
| Spain (2007)     | yes | no  | NR  | no | yes | yes | yes | yes | no | 5/9 | no |
| Stenager (1992)  | yes | yes | yes | NA | yes | yes | yes | yes | no | 7/8 | No |
| Striano (2003)   | yes | no  | NR  | NA | NR  | yes | yes | yes | no | 4/8 | no |
| Sumelahti (2004) | yes | yes | yes | NA | yes | yes | yes | yes | no | 7/8 | no |
| Sun (2013)       | yes | yes | yes | NA | yes | yes | no  | no  | no | 5/8 | no |

|                        |     |     |     |     |     |     |     |     |     |     |    |
|------------------------|-----|-----|-----|-----|-----|-----|-----|-----|-----|-----|----|
| Sundgren (2013)        | yes | no  | NR  | no  | no  | yes | yes | yes | no  | 4/9 | No |
| Sunesen (2010)         | yes | yes | yes | NA  | yes | yes | no  | yes | no  | 6/8 | no |
| Tachibana (1994)       | yes | no  | no  | NA  | no  | yes | yes | no  | no  | 3/8 | no |
| Tanriverdi (2010)      | yes | no  | yes | NA  | NR  | yes | yes | yes | no  | 5/8 | no |
| Tarrants (2011)        | yes | no  | yes | NA  | no  | yes | no  | no  | no  | 3/8 | no |
| Thielscher (2013)      | no  | yes | yes | NA  | NR  | yes | no  | no  | yes | 4/8 | no |
| Till (2012)            | yes | no  | yes | no  | NR  | yes | yes | yes | no  | 5/9 | no |
| Tourbah (1998)         | no  | no  | NR  | no  | yes | yes | yes | no  | no  | 3/8 | no |
| Tremlett (2002)        | yes | yes | yes | NA  | yes | yes | NR  | yes | no  | 6/8 | no |
| Trouillas (1971)       | no  | no  | NR  | NA  | NR  | no  | no  | no  | no  | 0/9 | no |
| Turner (2006)          | yes | no  | no  | yes | no  | yes | no  | no  | yes | 4/9 | no |
| Turner (2009)          | yes | no  | no  | yes | yes | yes | no  | no  | yes | 5/9 | no |
| Turpin (2007)          | yes | yes | yes | no  | yes | yes | no  | no  | no  | 5/9 | no |
| Uribe San-Martin(2001) | yes | no  | yes | NA  | yes | yes | yes | yes | no  | 6/8 | no |

|                 |     |     |     |     |     |     |     |     |     |     |    |
|-----------------|-----|-----|-----|-----|-----|-----|-----|-----|-----|-----|----|
| Valleroy (1984) | yes | no  | no  | yes | no  | yes | NR  | no  | no  | 3/9 | no |
| Vavrova (2012)  | yes | no  | NR  | no  | yes | yes | yes | yes | yes | 6/9 | no |
| Vogt (2009)     | yes | no  | NR  | no  | no  | yes | yes | no  | no  | 3/9 | no |
| Viveiros (2010) | yes | no  | NR  | NA  | NR  | yes | yes | yes | no  | 4/8 | no |
| Wertman (1992)  | no  | yes | yes | NA  | NR  | yes | yes | NR  | no  | 4/8 | no |
| Williams (2005) | yes | no  | no  | yes | no  | yes | no  | yes | no  | 4/9 | no |
| Wood (2012)     | yes | yes | yes | no  | yes | yes | yes | yes | no  | 7/9 | no |
| Wynn (1990)     | no  | yes | yes | NA  | yes | yes | yes | no  | no  | 5/8 | no |
| Zettl (2013)    | yes | no  | NR  | no  | NR  | yes | NR  | yes | no  | 3/8 | no |
| Zorzon (2001)   | yes | no  | NR  | no  | no  | yes | yes | yes | no  | 4/9 | no |
| Zorzon (2003)   | yes | no  | yes | no  | NR  | yes | yes | no  | no  | 4/9 | no |

NA: not applicable, NR: not reported, a: reported positive predictive value of diagnosis of MS in hospital data, b: from electronic health records, but validity of general practitioner diagnoses not reported.
